# Supplementary material for: 45S rDNA Diversity In Natura as One Step towards Ribosomal Heterogeneity in Arabidopsis thaliana
Source: MDPI journal article supplement (doi:10.3390/plants12142722), 2023-07-21
Supplement: s1 [file s1]

**Figure S3:** 5'ETS variants identified in Brassicaceae Lineage I, Clade A, Camelinae and Brassicaceae Lineage II, Clade B.

**(A)** Fasta sequences of 5'ETS variants

Brassicaceae Lineage I, Clade A, Camelinae

AtVARA and AtVARB stands for the two variants known in *Arabidopsis thaliana*.

Ah1 and Ah2 are two independent cloned sequences for *Arabidopsis halleri*.

Al1-3 are two independent cloned sequences for *Arabidopsis lyrata*.

Ap1-4 are four independent cloned sequences for *Arabidopsis pedemontana*.

Ac1 is supported by two independent clones whereas Ac2 sequence was only cloned once for *Arabidopsis cebennensis*.

Brassicaceae Lineage II, Clade B

Bo was only cloned once and shared 100% sequence identity with the published sequence for *Brassica oleracea* [25].

**(B)** Multiple Sequence Comparison by Log- Expectation (MUSCLE) alignments of 5'ETS variants grouping them in an alignment by length and whether they contain or not an insertion splitting away the conserved U3 snoRNP binding site A<sup>123</sup>B from the primary processing site P. There is no insertion for *Brassica oleracea* (Bo) and *Arabidopsis cebennensis* (Ac2).

**(A)** Fasta sequences of 5'ETS variants

Brassicaceae Lineage I, Clade A, Camelinae

>At\_VARA

```
CTTTTCCGGGCACCTTTTCCGGCGATCGGTTTTGTTGCCTTTTTCCGAGTTTTCTCAGCAGTTCTCGGACAAAACTGCTG
AATCGTCGAGGAGAATGGGCTTGCTTGCCTGGGCTGCCATTAGTTCTTCGAGGCGTTAGGGTGGCGGCGGTATAAAAGTG
TCGGAGTTTTTTCAGCAGTTCTCGGACAAAAATTGCTGAGTGGCCGAGAAGAATGGGCGTGTCATGCGTGGGCTGACATG
GATTCTTCGAGGCCTAGGGGTGGCGGTATATAACTTGTTTCGCATGATATTACCGAGATGTCCCCACGGGCATCTTTTCAC
CTCGTCGCCGAAGAGAATGGGCGTGTCATGGCATGGGCTGACATGGATTCTCCTAGGCCGTTTGGGTGGCGGTATAGTCG
TCTTGCGCACGAAATACCGAGATGTCCCATGGGCATCGATTCCACCCGCCTAGGTTGGATGGGCGTGCTTCGTCGGAAA
GCATGGATCCGCCTAGGCTGTCCCGAGTGTGAGCGAGGTGTGAGTGTGCGCCATGGGCATCGACACCTTGCGGCTAGGAA
CTGGAACGAGACGGGTGGCAAAGATTTTCAGTAGCACTTCATACTACCGTGGGTTTTTAAACCTTCCGAGTTTTGTTGA
TGTTATTTCCGAGAATTAGCAAACCGTAACGAAGATGTTCTTGGAACCATCTTTTGATGGGAGTCCGGCTGTTTCGATAGC
CGGCCAAGGGTGATGAACGAAATGTGAACCTTGCTCGCCTAGGTTGGATGGGCGTGCTTCGTTGGAAAGCATGGATCC
GCCTAGGCTGTCCCGAGTGTGAGCGAGGTGTGAGTGTGCGCCATGGGCATCGACACCTTGCGGCTAGGAAGTGAACGAG
ACGGGTAGCAAAGATTTTCAGTAGCACTTCATACTACCGTGGGTTTTTAAACCTTCTAGTTTTGTTGATGTTATTCCG
AGAATTAGCAAACCGTAACGAAGATGTTCTTGGAACCATCTTTTGATGGGAGTCCGGCTGTTTCGAAAGCCGGCCAAGGG
TGATGAACGAAATGTGAACCTTGCTCGCCTAGGTTGGATGGGCGTGCTTCGTTGGAAAGCATGGATCCGCCTAGGCTG
TCCCGAAGTATCTCGCGCTTGACGGCTTTGGCTCGGATTGTCGCTCTTCTTTCTTCTTAGCCGAGTACTTCGGTAGAT
TAGTTGGAACGATTGATGATTTTGAGTTAATTGAACGTTCCGGCGTATGAGTGGTGATCGG
```

>At\_VARB

```
CTTTTCCGGGCACCTTTTCCGGCGATCGGTTTTGTTGCCTTTTTCCGAGTTTTCTCAGCAGTTCTCGGACAAAACTGCTG
AATCGTCGAGGAGAATGGGCTTGCTTGCCTGGGCTGCCATTAGTTCTTCGAGGCGTTAGGGTGGCGGCGGTATAAAAGT
GTCGGAGTTTTTTCAGCAGTTCTCGGACAAAAATTGCTGAGTGGCCGAGAAGAATGGGCGTGTCATGCGTGGGCTGACAT
GGATTCTTCGAGGCCTAGGGGTGGCGGTATATAACTTGTTTCGCATGATATTACCGAGATGTCCCCACGGGCATCTTTTCA
CCTCGTCGCCGAAGAGAATGGGCGTGTCATGGCATGGGCTGACATGGATTCTCCTAGGCCGTTTGGGTGGCGGTATAGTC
GTCTTGCGCACGAAATACCGAGATGTCCCATGGGCATCGATTCCACCCGCCTAGGTTGGATGGGCGTGCTTCGTTGGAA
AGCATGGATCCGCCTAGGCTGTCCCGAGTGTGAGCGAGGTGTGAGTGTGCGCCATGGGCATCGACACCTTGCGGCTAGGA
ACTGGAACGAGACGGGTGCAAGATTTTCAGTAGCACTTCATACTACCGTGGGTTTTTAAACCTTCCCTAGTTTTGT
TGATGTTATTTCCGAGAATTAGCAAACCGTAACGAAGATGTTCTTGGAACCATCTTTTGATGGGAGTCCGGCTGTTTCGAA
AGCCGGCCAAGGGTGATGAACGAAATGTGAACCTTGCTCGCCTAGGTTGGATGGGCGTGCTTCGTTGGAAAGCATGGA
TCCGCCTAGGCTGACCCGAAGGTATCTCGCGCTTGACGGCTTTGGCTCGGATTGTCGCTCTTCTTTCTTCTTAGCCGA
GTACTTCGGTAGATTAGTTGGAACGATTGATGATTTTGAGTTAATTGAACGTTCCGGCGTATGAGTGGTGATCGG
```

>Ah1

```
CTTTTCCGGGCACCTTTTCCGGCGATCGGTTTTGTCGAGTTTTCCGGCATTCTCGGACAAAAATCGCTGAGTGGTCGCG
GAGAATGGGCGTGTCATGCGTGGGATGACATGGATTCTTCGAGGCTTGGGGTGGCGGTATATAAGGAGATCGCACAATA
TACCGAGATGTCCCCACGGGCATCGTTTCACTCCGTCGCCGAAGAGAATGGGCGTGTCATGACATGGGCTGACATGGATT
CTCCAAGGCCGTGGGTGGCGGTACATTCGGAATGCACACGAAATACCGAGATGTCCCATGGGCATCGATTCCACCCGCC
TAGGTTGGATGGGCGTGCTTCGTTGGAAAGCATGGATCCGCCTAGGCTGTCCGGGGATGAGCAAGGTGTGAGTGTGCGC
```

CATGGGCATCGACACCTTGCGGCTTCGAACGGAAACGGAGGTAAGCACAGGATTGTACGCCGAGCGGGTGTCTTGAGTC  
ATCCAGTTTACCTTTTGCGGATGTTTCATGGCAACCATCTTTTGATGGGAAGTGGATATCGGAAGTCAGTCTTTGACCGTG  
AAGTGCCATGAAGTTCCCAGGCTTTGTGTATAACTTCCGGACTGCGGCTTCGATATTGCGAGCCTAGGTTGGATGGGCGT  
GCGAAAGCATAGATCCGCCTAGGCTGTCCCGACGGTTTTTCGCGCTTGTGCGGCTTTGGCCTGGATTGTCGGTCTTCTC  
TCTTCTCAGCCGAATATTTCCGAGGAGTCGGGGAACGATTGATGTTTTTGGGTCAATTGAACGTTCCGGCGTATGAGTGGT  
GATCGG

>Ah2

CTTTTCCGGGCACCTTTTCCGGCGATCGGTTTTGTGCGAGTTTTCCGGCATTCTCGGACAAAAATCGCTGAGTGGTCGCG  
GAGAATGGGCGTGTTCATGCGTGGGATGACATGGATTCTTCGAGGCCTTGGGGTGGCGGTATATAAGGAGATCGCACATA  
TACCGAGATGTCCCCACGGGCATCGTTTTCACTCCGTGCGCGAAGAGAATGGTCGTGTATGACATGGGCTGACATGGATT  
CTCCAAGGCCGTGGGTGGTATATTCCGAATGCACACGAAATACCGAGATGTCCCATGGGCATCGATTCCACCCGCC  
TAGGTTGGATGGGCGTGCTTCGTTGGAAAGCATGGATCCGCCTAGGCTGTCCCGGGATGAGCAAGGTGTGAGTGTGCGC  
CATGGGCATCGACACCTTGCGGCTTCGAACGGAAACGGAGGTAAGCACAGGATTGTACGCCGAGCGGGTGTCTTGAGTC  
ATCCAGTTTACCTTTTGCGGATGTTTCATGGCAACCATCTTTGATGGGAAGTGGATATCGGAAGTCAGTCTTTGACCGTG  
AAGTGCCATGAAGTTCCCAGGCTTTGTGTATAACTTCCGGACTGCGGCTTCGATATTGCGAGCCTAGGTTGGATGGGCGT  
GCGAAAGCATAGATCCGCCTAGGCTGTCCCGACGGTTTTTCGCGCTTGTGCGGCTTTGGCCTGGATTGTCGGTCTTCTC  
TCTTCTCAGCCGAATATTTCCGAGGAGTCGGGGAACGATTGATGTTTTTGGGTCAATTGAACGTTCCGGCGTATGAGTGGT  
GATCGG

>Al1

CTTTTCCGGGCACCTTTTCCGGCGATCGGTTTTGTTGCGAGTTTTCCGAGTTTTTTCAGCAGTTCTCGGACAAAAATTGCTG  
TGTGGTCGCGGAGAATGGGCGTGTTCATGCGTGGGATGACATGGATTCTTCGAGGCCTTGGGGTGGCGGTATATTGGGAAA  
GCGCATTGTATACCGAGATGTCCCCACGGGCATCGTTTTCACTCCGTGCGCGAAGAGAATGGGCGTGTTCATGACATGGGCT  
GACATGGATTCTCCTAGGCCGTGGGTGGCGGTATATTCCGAATGCGCCGAAATACCGAGATGTCCCATGGGCATCGAT  
TCCACCCGCCTAGGTTGGATGGGCGTGCTTCGTTGGAAAGCATGGATCCGCCTAGGCTGTCCCGAGTTGAGCAAGGTGTG  
AGTGTGCGCCATGGGCATCGACACCTTGCGGCTTTGAACTGAAACGGAGGTACGCGCAGCTGTTACGTCGTGCAGGGTTT  
CTCGGCGTCACTTCTAGCGGCTTTTGCGGATGTTCTTGCAACCATCTTTTGATGGGGAAGTGGATATCGGCTGGTAGTG  
ACACGAGGCTCCCGGTCTTGTGTGTATCCTTCGCACTGCGGCTCCGATATTGCGAGCCTAGGTTGGATGGGCGTGCGAAA  
GCATGGATCTGCCTAGGCTGTCTCGACGGTTTTTCGCGCTTGTGCGGCTTTGGCTTGATTGTCGGTCTTCTCTCTTCTC  
CAGCCGAATATTTCCGAGGAGTCGGGGAACGATTGATGTTTTTGGGTCAATTGAACGTTCCGGCGTATGAGTGGTGATCGG

>Al2

CTTTTCCGGGCACCTTTTCCGGCGATCGGTTTTGTTGCGAGTTTTTGAGTTTTTTCAGCAGTTCTCGGACAAAAATTGCTGT  
GTGGTCGCGGAGAATGGGCGTGTTCATGCGTGGGATGACATGGATTCTTCGAGGCCTTGGGGTGGCGGTATATTGGGAAAG  
CGCATTGTATACCGAGATGTCCCCACGGGCATCGTTTTCACTCCGTGCGCGAAGAGAATGGGCGTGTTCATGACATGGGCTG  
ACATGGATTCTCCTAGGCCGTGGGTGGCGGTATATTCCGAATGCGCCGAAATACCGAGATGTCCCATGGGCATCGATT  
CCACCCGCCTAGGTTGGATGGGCGTGCTTCGTTGGAAAGCATGGATCCGCCTAGGCTGTCCCGAGTTGAGCAAGGTGTGA  
GTGTCGCCCATGGGCATCGACACCTTGCGGCTTTGAACTGAAACGGAGGTACGCGCAGCTGTTACGTCGTGCAGGGTTT  
TCGGCGTCACTTCTAGCGGCTTTTGCGGATGTTCTTGCAACCATCTTTTGATGGGGAAGTGGATATCGGCTGGTAGTG  
CACGAGGCTCCCGGTCTTGTGTGTATCCTTCGCACTGCGGCTCCGATATTGCGAGCCTAGGTTGGATGGGCGTGCGAAAG  
CATGGATCTGCCTAGGCTGTCTCGACGGTTTTTCGCGCTTGTGCGGCTTTGGCTTGATTGTCGGTCTTCTCTCTTCTC  
AGCCGAATATTTCCGAGGAGTCGGGGAACGATTGATGTTTTTGGGTCAATTGAACGTTCCGGCGTATGAGTGGTGATCGG

>Al3

CTTTTCCGGGCACCTTTTCCGGCGATCGGTTTTGTTGCGAGTTTTCCGAGTTTTTTCAGCAGTTCTCGGACAAAAATTGCTG  
AGTGGTCGCGGAGAATGGGCGTGTCAAGCGTGGGATGACATGGATTCTTCGAGACCTTGGGGTGGCGGTATATAACTCTC  
CACGATGGTATACCGAGATGTCCCCACGGGCATCGTTTTCACTCCGTGCGCGAAGAGAATGGGCGTGTTCATGACATGGGC  
TGACATGGATTCTCCTAGGCCGTGGGTGGCGGTATATTCCGAATGCGCCGAAATACCGAGATGTCCCATGGGCATCGA  
TTCCACCCGCCTAGGTTGGATGGGCGTGCTTCGTTGGAAAGCATGGATCCGCCTAGGCTGTCCCGAGTTGAGCAAGGTGT  
GAGTGTGCGCCATGGGCATCGACACCTTGCGGCTTTGAACTGAAACGGAGGTACGCGCAGCTGTTACGTCGTGCAGGGTT  
TCTCGGCGTCACTTCTAGCGGCTTTTGCGGATGTTCTTGCAACCATCTTTTGATGGGGAAGTGGATATCGGCTGGTAGT  
GACACGAGGCTCCCGGTCTTGTGTGTATCCTTCGCACTGCGGCTCCGATATTGCGAGCCTAGGTTGGATGGGCGTGCGAA  
AGCATGGATCTGCCTAGGCTGTCTCGACGGTTTTTCGCGCTTGTGCGGCTTTGGCTTGATTGTCGGTCTTCTCTCTTCTC  
TCAGCCGAATATTTCCGAGGAGTCGGGGAACGATTGATGTTTTTGGGTCAATTGAACGTTCCGGCGTATGAGTGGTGATCG  
G

>Ap1

CTTTTCCGGGCACCTTTTCCGGCGATCGGTTTTGTGCGAGTTTTCCGAGTTTTTTCAGCAGTTCTCGGACAAAAATTGCTG  
TGTGGTCGCGGAGAATGGGCGTGTTCATGCGTGGGATGACATGGATTCTTCGAGGCCTTGGGGTGGCGGTATATAAGGAGA  
GCGCATGGTATACCGAGATGTCTCCACGGGCATCGTTTTCACTCCGTTGCCGAAGAGAATGGGCGTGTTCATGACATGGGCT  
GACATGGATTCTCCTAGGCCGTGGGTGGCGGTATATTCCGAATGCGCACGATATACCGAGATGTCCCATGGGCATCGAT  
TCCACCCGCCTAGGTTGGATGGGCGTGCTTCGTTGGAAAGCATGGATCTGCCTAGGCTGTCCCGGGGTGAGCAAGGTTTG  
AGTGTGCTCATGGGCATCGACACCTTGCGTCTTTGAAACGGAAGCGAAGGTAAGCGGATGATTGACGACGAGCGGGTCTC  
TCGGAGTTGTCTAGTTTACCTTTTGCGGATGTTTTTGCAACCATCTTTTCGATGGGAAGTGGATATCGGAAGTCAGTCTT  
TGGACCGAGAAGTTACACGAAGTACCCAGGCTTTGTGCGTAACTTCGCACTGCGGCTACGATATTGCGAGCCTAGGTTG  
GATGGGCGTGCTAAAGCATGGATCCGCCTAGGCTGTCTGACGGTTTTTCGCGCTTGTGCGGCTTTGGCTTGATTGCTC

CGTCTTCTCTCTTCTCAGCCGAATATTTTCGGAGGAGTCGGGGAACGATTGATGTTTTTGGGTCAATTGAACGTTTCGGCGT  
ATGAGTGGTGATCGG

>Ap2

CTTTTCCGGGCACTTTTCCGGCGATCGGTTTTGTGTCAGTTTTCCGAGTTTTTTTCAGCAGTTCTCGGACAAAAATTGCTG  
TGTGGTCGCGGAGAATGGGCGTGTCTATGCGTGGGATGACATGGATTCTTCGAGGCCTTGGGGTGGCGGTATATAAGGAGA  
GCGCATGGTATACCGAGATGTCTCCACGGGCATCGTTTTCACTCCGTTGCCGAAGAGAATGGGCGTGTCTATGACATGGGCT  
GACATGGATTCTCCTAGGCCGTGGGTGGCGGTATATTCGGAATGCGCACGATATACCGAGATGTCCCATGGGCATCGAT  
TCCACCCGCCTAGGTTGGATGGGCGTGCTTCGTTGGAAGCATGGATCTGCCTAGGCTGTCCCGGGGTGAGCAAGGTTTG  
AGTATCGCTCATGGGCATCGACACCTTGCGTCTTTGAACGGAAGCGAAGGTAAGCGGATGATTGACGACGAGCGGGTCTC  
TCGGAGTTGTCTAGTTTACCTTTTGCGGATGTTTTTGGGAACCATCTTTTCGATGGGAAGTGGATATCGGAAGTCAGTCTT  
TGGACCGAGAAGTTACACGAAGTACCCAGGCTTTGTGCGTAACTTCCGCACTGCGGCTACGATATTCGCAGCCTAGGTTG  
GATGGGCGTGCTAAAGCATGGATCCGCCTAGGCTGTCTCGACGGTTTTTCGCGCTTGTGCGGCTTTGGCTTGGATTGCTC  
CGTCTTCTCTCTTCTCAGCCGAATATTTTCGGAGGAGTCGGGGAACGATTGATGTTTTTGGGTCAATTGAACGTTTCGGCGT  
ATGAGTGGTGATCGG

>Ap3

CTTTTCCGGGCACTTTTCCGGCGATCGGTTTTGTGTCAGTTTTCCGAGTTTTTTTCAGCAGTTCTCGGACAAAAATTGCTG  
TGTGGTCGCGGAGAATGGGCGTGTCTATGCGTGGGATGACATGGATTCTTCGAGGCCTTGGGGTGGCGGTATATAAGGAGA  
GCGCATGGTATACCGAGATGTCTCCACGGGCATCGTTTTCACTCCGTTGCCGAAGAGAATGGGCGTGTCTATGACATGGGCT  
GACATGGATTCTCCTAGGCCGTGGGTGGCGGTATATTCGGAATGCGCACGATATACCGAGTTGTCCCATGGGCATCGAT  
TCCACCCGCCTAGGTTGGATGGGCGTGCTTCGTTGGAAGCATGGATCTGCCTAGGCTGTCCCGGGGTGAGCAAGGTGTG  
AGTGTGCTCATGGGCATCGACACCTTGCGTCTTTGAACGGAAGCGAAGGTAAGCGGATGATTGACGACGAGCGGGTCTC  
TCGGAGTTGTCTAGTTTACCTTTTGCGGATGTTTTTGGCAACCATCTTTTCGATGGGAAGTGGATATCGGAAGTCAGTCTT  
TGGACCGAGAAGTTACACGAAGTACCCAGGCTTTGTGCGTAACTTCCGCACTGCGGCTACGATATTCGCAGCCTAGGTTG  
GATGGGCGTGCTAAAGCATGGATCCGCCTAGGCTGTCTTGACGGTTTTTCGCGCTTGTGCGGCTTTGGCTTGGATTGCTC  
CGTCTTCTCTCTTCTCAGCCGAATATTTTCGGAGGAGTCGGGGAACGATTGATGTTTTTGGGTCAATTGAACGTTTCGGCGT  
ATGAGTGGTGATCGG

>Ap4

CTTTTCCGGGCACTTTTCCGGCGATCGGTTTTGTGTCAGTTTTCCGAGTTTTTTTCAGCAGTTCTCGGACAAAAATTGCTG  
TGTGGTCGCGGAGAATGGGCGTGTCTATGCGTGGGATGACATGGATTCTTCGAGGCCTTGGGGTGGCGGTATATAAGGAGA  
GCGCATGGTATACCGAGATGTCTCCACGGGCATCGTTTTCACTCCGTTGCCGAAGATAATGGGCGTGTCTATGACATGGGCT  
GACATGGATTCTCCTAGGCCGTGGGTGGCGGTATATTCGGAATGCGCACGATATACCGAGATGTCCCATGGGCATCGAT  
TCCACCCGCCTAGGTTGGATGGGCGTGCTTCGTTGGAAGCATGGATCTGCCTAGGCTGTCCCGGGGTGAGCAAGGTTTG  
AGTGTGCTCATGGGCATCGACACCTTGCGTCTTTGAACGGAAGCGAAGGTAAGCGGATGATTGACGACGAGCGGGTCTC  
TCGGAGTTGTCTAGTTTACCTTTTGCGGATGTTTTTGGCAACCATCTTTTCGATGGGAAGTGGATATCGGAAGTCAGTCTT  
TGGACCGAGAAGTTACACGAAGTACCCAGGCTTTGTGCGTAACTTCCGCACTGCGGCTACGATATTCGCAGCCTAGGTTG  
GATGGGCGTGCTAAAGCATGGATCCGCCTAGGCTGTCTTGACGGTTTTTCGCGCTTGTGCGGCTTTGGCTTGGATTGCTC  
CGTCTTCTCTCTTCTCAGCCGAATATTTTCGGAGGAGTCGGGGAACGATTGATGTTTTTGGGTCAATTGAACGTTTCGGCGT  
ATGAGTGGTGATCGG

>Ac1

CTTTTCCGGGCACTTTTCCGGCGATCGGTTTTGGTTCGAGTTTTTCCGAGTTTTTTTCAGCAGTTCTCGGACAAAAATTGCTG  
TGTGGTCGCGGAGAATGGGCGTGTCTATGCGTGGGATGACATGGATTCTTCGAGGCCTTGGGGTGGCGGTATATAAGGAGA  
GCGCATGGTATACCGAGATGTCCCCACGGGCATCGTTTTCACTCCCTTGCCGAAGAGAATGGGCGTGTCTATGACATGGGCT  
GACATGGATTCTCCTAGGCCGTGGGTGGCTGTATATTCGGGAATGCGCACGAAATACCGAGATGTCCCATGGGCATCG  
ATTCCACCCGCCTAGGTTGGATGGGCGTGCTTCGTTGGAAGCATGGATCTGCCTAGGCTGTCCCGGGGTGAGCAAGGTG  
TGAGTGTGCCCCATGGGCATCGACACCTTGCGTCTTTGAACGGAACGAAGGTAAGCAGAGGATTGACGACGAGCGGGTCTC  
TCTCGGTGTTTTCTAGTTTACCTTTAGCGGATGTTCTTTGGCAACCATCTTTTCGATGGGAAGTGGATATCGGAAGTCAGT  
CTTTGGACCGAGAAGTGACACGAAGTACCCAGGCTTTGTGTGTAACCTCCGCACTGCGGCTACGATATTCGCAGCCTAGG  
TTGGATGGGCGTGCGAAAGCATGGATCCGCCTAGGCTGTCTTGACGGTTTTTCGCGCTTGTGCGGCTTTGGCTTGGATTG  
GTCCGTCTTCTCTCTTCTCAGCCGAATATTTTCGGAGGAGTCGGGGAACGATTGATGTTTTTGGGTCAATTGAACGTTTCGG  
CGTATGAGTGGTGATCGG

>Ac2

CTTTTCCGGGCACTTTTCCGGTGGACATTTTGGCCCTAAATCAAATTTTCGCGCTTGTGTGGTCTTGGCCTGGTTTCA  
TCCGTCTTCCAGTGCTCTTTTGATTACATCTCGAGAGTGTTGGAAAGATTGATGTTAGCGGGCAATGAACGTTTCGGC  
GTATGAGTGGTGATCGA

## Brassicaceae Lineage II, Clade B

>Bo

CTTTTCCGGGCACTTTTCCGGCGACTTTTCCGGTGGACATTTTGGCCCTAAATCAAATTTTCGCGCTTGTGTGGTCTTGGCCTGGTTTCA  
GCCCTGGTTTTCATCCGTCTTCCAGTGCTCTTTTGATTACATCTCGAGAGTGTTGGAAAGATTGATGTTAGCGGGCAATGAACGTTTCGGC  
TTGAACGTGCGGCGTATGAGTGGTGATCGG

## (B) MUSCLE alignment of 5'ETS variants

*Arabidopsis* genus variants with the exception of the *A. cebennensis* insertion free Ac2 variant

|         | A2                                                          | A3 | B |
|---------|-------------------------------------------------------------|----|---|
| At_VARA | CTTTTCCGGGCACTTTTCCGGCGATCGGTTTTGTTGCCTTTTCCGAGTTTTCTCAGCAG |    |   |
| At_VARB | CTTTTCCGGGCACTTTTCCGGCGATCGGTTTTGTTGCCTTTTCCGAGTTTTCTCAGCAG |    |   |
| Ac1     | CTTTTCCGGGCACTTTTCCGGCGATCGGTTTGGTCGC-----AGTTT-----        |    |   |
| Ah1     | CTTTTCCGGGCACTTTTCCGGCGATCGGTTTTGTCGC-----AGTTT-----        |    |   |
| Ah2     | CTTTTCCGGGCACTTTTCCGGCGATCGGTTTTGTCGC-----AGTTT-----        |    |   |
| Al1     | CTTTTCCGGGCACTTTTCCGGCGATCGGTTTTGTTGC-----AGTTT-----        |    |   |
| Al2     | CTTTTCCGGGCACTTTTCCGGCGATCGGTTTTGTTGC-----AGTTT-----        |    |   |
| Al3     | CTTTTCCGGGCACTTTTCCGGCGATCGGTTTTGTTGC-----AGTTT-----        |    |   |
| Ap1     | CTTTTCCGGGCACTTTTCCGGCGATCGGTTTTGTCGC-----AGTTT-----        |    |   |
| Ap2     | CTTTTCCGGGCACTTTTCCGGCGATCGGTTTTGTGTC-----AGTTT-----        |    |   |
| Ap3     | CTTTTCCGGGCACTTTTCCGGCGATCGGTTTTGTCGC-----AGTTT-----        |    |   |
| Ap4     | CTTTTCCGGGCACTTTTCCGGCGATCGGTTTTGTGTC-----AGTTT-----        |    |   |
|         | ***** ** *                                                  |    |   |

### D1a Gruendler

|         |                                                             |
|---------|-------------------------------------------------------------|
| At_VARA | TTCTCGGACAAAACTGCTGAATCGTCGAGGAGAATGGGCTTG-CTTGCCTGGGCTGCCA |
| At_VARB | TTCTCGGACAAAACTGCTGAATCGTCGAGGAGAATGGGCTTGCTTGCCTGGGCTGCCA  |
| Ac1     | -----                                                       |
| Ah1     | -----                                                       |
| Ah2     | -----                                                       |
| Al1     | -----                                                       |
| Al2     | -----                                                       |
| Al3     | -----                                                       |
| Ap1     | -----                                                       |
| Ap2     | -----                                                       |
| Ap3     | -----                                                       |
| Ap4     | -----                                                       |

|         |                                                               |
|---------|---------------------------------------------------------------|
| At_VARA | TTAGTTCTTCGAGGCGTTAGGGTGGCGGCGGTATAAAAGTGTCGGAGTTTTTTTCAGCAGT |
| At_VARB | TTAGTTCTTCGAGGCGTTAGGGTGGCGGCGGTATAAAAGTGTCGGAGTTTTTTTCAGCAGT |
| Ac1     | -----TCCGAGTTTTTTTCAGCAGT                                     |
| Ah1     | -----TCGG-----GCATT                                           |
| Ah2     | -----TCGG-----GCATT                                           |
| Al1     | -----TCCGAGTTTTTTTCAGCAGT                                     |
| Al2     | -----TT-GAGTTTTTTTCAGCAGT                                     |
| Al3     | -----TCCGAGTTTTTTTCAGCAGT                                     |
| Ap1     | -----TCCGAGTTTTTTTCAGCAGT                                     |
| Ap2     | -----TCCGAGTTTTTTTCAGCAGT                                     |
| Ap3     | -----TCCGAGTTTTTTTCAGCAGT                                     |
| Ap4     | -----TCCGAGTTTTTTTCAGCAGT                                     |
|         | * * * * *                                                     |

### D1b Gruendler

|         |                                                               |
|---------|---------------------------------------------------------------|
| At_VARA | TCTCGGACAAAAATTGCTGAGTGGCCGAGAAGAATGGGCGTGTCATGCGTGGGCTGACAT  |
| At_VARB | TCTCGGACAAAAATTGCTGAGTGGCCGAGAAGAATGGGCGTGTCATGCGTGGGCTGACAT  |
| Ac1     | TCTCGGACAAAAATTGCTGTGTGGTTCGCGGAGAATGGGCGTGTCATGCGTGGGATGACAT |
| Ah1     | TCTCGGACAAAAATCGCTGAGTGGTTCGCGGAGAATGGGCGTGTCATGCGTGGGATGACAT |
| Ah2     | TCTCGGACAAAAATCGCTGAGTGGTTCGCGGAGAATGGGCGTGTCATGCGTGGGATGACAT |
| Al1     | TCTCGGACAAAAATTGCTGTGTGGTTCGCGGAGAATGGGCGTGTCATGCGTGGGATGACAT |
| Al2     | TCTCGGACAAAAATTGCTGTGTGGTTCGCGGAGAATGGGCGTGTCATGCGTGGGATGACAT |
| Al3     | TCTCGGACAAAAATTGCTGAGTGGTTCGCGGAGAATGGGCGTGTCATGCGTGGGATGACAT |
| Ap1     | TCTCGGACAAAAATTGCTGTGTGGTTCGCGGAGAATGGGCGTGTCATGCGTGGGATGACAT |
| Ap2     | TCTCGGACAAAAATTGCTGTGTGGTTCGCGGAGAATGGGCGTGTCATGCGTGGGATGACAT |
| Ap3     | TCTCGGACAAAAATTGCTGTGTGGTTCGCGGAGAATGGGCGTGTCATGCGTGGGATGACAT |
| Ap4     | TCTCGGACAAAAATTGCTGTGTGGTTCGCGGAGAATGGGCGTGTCATGCGTGGGATGACAT |
|         | *****                                                         |

|         |                                                      |           |
|---------|------------------------------------------------------|-----------|
| At_VARA | GGATTCTTCGAGGCCTAGGGGTGGCGGTATATAACT-TGTTTCGCATGATAT | TACCGAGAT |
| At_VARB | GGATTCTTCGAGGCCTAGGGGTGGCGGTATATAACT-TGTTTCGCATGATAT | TACCGAGAT |
| Ac1     | GGATTCTTCGAGGCCTTGGGGTGGCGGTATATAAGG-AGAGCGCATGGTA-  | TACCGAGAT |
| Ah1     | GGATTCTTCGAGGCCTTGGGGTGGCGGTATATAAGG-AGATCGCACAAATA- | TACCGAGAT |
| Ah2     | GGATTCTTCGAGGCCTTGGGGTGGCGGTATATAAGG-AGATCGCACAAATA- | TACCGAGAT |
| Al1     | GGATTCTTCGAGGCCTTGGGGTGGCGGTATATTGGG-AAAGCGCATTGTA-  | TACCGAGAT |
| Al2     | GGATTCTTCGAGGCCTTGGGGTGGCGGTATATTGGG-AAAGCGCATTGTA-  | TACCGAGAT |
| Al3     | GGATTCTTCGAGACCTTGGGGTGGCGGTATATAACTCTCCACGCATGGTA-  | TACCGAGAT |
| Ap1     | GGATTCTTCGAGGCCTTGGGGTGGCGGTATATAAGG-AGAGCGCATGGTA-  | TACCGAGAT |
| Ap2     | GGATTCTTCGAGGCCTTGGGGTGGCGGTATATAAGG-AGAGCGCATGGTA-  | TACCGAGAT |
| Ap3     | GGATTCTTCGAGGCCTTGGGGTGGCGGTATATAAGG-AGAGCGCATGGTA-  | TACCGAGAT |
| Ap4     | GGATTCTTCGAGGCCTTGGGGTGGCGGTATATAAGG-AGAGCGCATGGTA-  | TACCGAGAT |

\*\*\*\*\*      \*\*\*      \*\*\*\*\*      \*\*\*\*\*      \*\*\*\*      \*\*      \*\*\*\*\*

**D2a Gruendler**

|         |                                                                 |
|---------|-----------------------------------------------------------------|
| At_VARA | GTCCCCACGGGCATCTTTTCACTCGTCGCCGAAGAGAATGGGCGTGTCATGGCATGGGC     |
| At_VARB | GTCCCCACGGGCATCTTTTCACTCGTCGCCGAAGAGAATGGGCGTGTCATGGCATGGGC     |
| Ac1     | GTCCCCACGGGCATCGTTTCACTCCCTTGGCGAAGAGAATGGGCGTGTCATGACATGGGC    |
| Ah1     | GTCCCCACGGGCATCGTTTCACTCCCTCGTCGCCGAAGAGAATGGGCGTGTCATGACATGGGC |
| Ah2     | GTCCCCACGGGCATCGTTTCACTCCCTCGTCGCCGAAGAGAATGGTCTGTCATGACATGGGC  |
| Al1     | GTCCCCACGGGCATCGTTTCACTCCCTCGTCGCCGAAGAGAATGGGCGTGTCATGACATGGGC |
| Al2     | GTCCCCACGGGCATCGTTTCACTCCCTCGTCGCCGAAGAGAATGGGCGTGTCATGACATGGGC |
| Al3     | GTCCCCACGGGCATCGTTTCACTCCCTCGTCGCCGAAGAGAATGGGCGTGTCATGACATGGGC |
| Ap1     | GTCTCCACGGGCATCGTTTCACTCCGTTGCCGAAGAGAATGGGCGTGTCATGACATGGGC    |
| Ap2     | GTCTCCACGGGCATCGTTTCACTCCGTTGCCGAAGAGAATGGGCGTGTCATGACATGGGC    |
| Ap3     | GTCTCCACGGGCATCGTTTCACTCCGTTGCCGAAGAGAATGGGCGTGTCATGACATGGGC    |
| Ap4     | GTCTCCACGGGCATCGTTTCACTCCGTTGCCGAAGATTAATGGGCGTGTCATGACATGGGC   |

\*\*\*      \*\*\*\*\*      \*\*\*\*\*      \*      \*      \*\*\*\*\*      \*\*\*\*\*      \*\*\*\*\*      \*\*\*\*\*

**D12 Gruendler**

|         |                                                              |
|---------|--------------------------------------------------------------|
| At_VARA | TGACATGGATTCTCCTAGGCCGTTTGGGTGGCGGTATAGTC--GTCTTGCGCACGAAATA |
| At_VARB | TGACATGGATTCTCCTAGGCCGTTTGGGTGGCGGTATAGTC--GTCTTGCGCACGAAATA |
| Ac1     | TGACATGGATTCTCCTAGGCCG--TGGGTGGCTGTATATTCGGGGAATGCGCACGAAATA |
| Ah1     | TGACATGGATTCTCCAAGGCCG--TGGGTGGCGGTACATTC--GGAATGCACACGAAATA |
| Ah2     | TGACATGGATTCTCCAAGGCCG--TGGGTGGTGGTATATTC--GGAATGCACACGAAATA |
| Al1     | TGACATGGATTCTCCTAGGCCG--TGGGTGGCGGTATATTC--GGAATGCGCCCGAAATA |
| Al2     | TGACATGGATTCTCCTAGGCCG--TGGGTGGCGGTATATTC--GGAATGCGCCCGAAATA |
| Al3     | TGACATGGATTCTCCTAGGCCG--TGGGTGGCGGTATATTC--GGAATGCGCCCGAAATA |
| Ap1     | TGACATGGATTCTCCTAGGCCG--TGGGTGGCGGTATATTC--GGAATGCGCACGATATA |
| Ap2     | TGACATGGATTCTCCTAGGCCG--TGGGTGGCGGTATATTC--GGAATGCGCACGATATA |
| Ap3     | TGACATGGATTCTCCTAGGCCG--TGGGTGGCGGTATATTC--GGAATGCGCACGATATA |
| Ap4     | TGACATGGATTCTCCTAGGCCG--TGGGTGGCGGTATATTC--GGAATGCGCACGATATA |

\*\*\*\*\*      \*\*\*\*\*      \*\*\*\*\*      \*\*\*      \*      \*      \*      \*      \*      \*      \*      \*

**D2b Gruendler**      **C3 repeat**      28

|         |                                 |                              |    |
|---------|---------------------------------|------------------------------|----|
| At_VARA | CCGAGATGTCCCCATGGGCATCGATTCCACC | CGCCTAGGTTGGATGGGCGTGCTTCGTT | CG |
| At_VARB | CCGAGATGTCCCCATGGGCATCGATTCCACC | CGCCTAGGTTGGATGGGCGTGCTTCGTT | TG |
| Ac1     | CCGAGATGTCCCCATGGGCATCGATTCCACC | CGCCTAGGTTGGATGGGCGTGCTTCGTT | TG |
| Ah1     | CCGAGATGTCCCCATGGGCATCGATTCCACC | CGCCTAGGTTGGATGGGCGTGCTTCGTT | TG |
| Ah2     | CCGAGATGTCCCCATGGGCATCGATTCCACC | CGCCTAGGTTGGATGGGCGTGCTTCGTT | TG |
| Al1     | CCGAGATGTCCCCATGGGCATCGATTCCACC | CGCCTAGGTTGGATGGGCGTGCTTCGTT | TG |
| Al2     | CCGAGATGTCCCCATGGGCATCGATTCCACC | CGCCTAGGTTGGATGGGCGTGCTTCGTT | TG |
| Al3     | CCGAGATGTCCCCATGGGCATCGATTCCACC | CGCCTAGGTTGGATGGGCGTGCTTCGTT | TG |
| Ap1     | CCGAGATGTCCCCATGGGCATCGATTCCACC | CGCCTAGGTTGGATGGGCGTGCTTCGTT | TG |
| Ap2     | CCGAGATGTCCCCATGGGCATCGATTCCACC | CGCCTAGGTTGGATGGGCGTGCTTCGTT | TG |
| Ap3     | CCGAGTTGTCCCCATGGGCATCGATTCCACC | CGCCTAGGTTGGATGGGCGTGCTTCGTT | TG |
| Ap4     | CCGAGATGTCCCCATGGGCATCGATTCCACC | CGCCTAGGTTGGATGGGCGTGCTTCGTT | TG |

\*\*\*\*\*      \*\*\*\*\*      \*\*\*\*\*      \*\*\*\*\*      \*\*\*\*\*      \*\*\*\*\*      \*\*\*\*\*      \*\*\*\*\*      \*\*\*\*\*      \*

|         | C3 repeat                                                    | C1 repeat                   |
|---------|--------------------------------------------------------------|-----------------------------|
| At_VARA | GAAAGCATGGATCCGCCTAGGCTGTCCCAGTGTGAGC                        | GAGGTGTGAGTGTGCGCCATGG      |
| At_VARB | GAAAGCATGGATCCGCCTAGGCTGTCCCAGTGTGAGC                        | GAGGTGTGAGTGTGCGCCATGG      |
| Ac1     | GAAAGCATGGATCTGCCTAGGCTGTCCCAGGG                             | TGAGCAAGGTGTGAGTGTGCGCCATGG |
| Ah1     | GAAAGCATGGATCCGCCTAGGCTGTCCCAGGGATGAGCAAGGTGTGAGTGTGCGCCATGG |                             |
| Ah2     | GAAAGCATGGATCCGCCTAGGCTGTCCCAGGGATGAGCAAGGTGTGAGTGTGCGCCATGG |                             |
| Al1     | GAAAGCATGGATCCGCCTAGGCTGTCCCAGT                              | TGAGCAAGGTGTGAGTGTGCGCCATGG |
| Al2     | GAAAGCATGGATCCGCCTAGGCTGTCCCAGT                              | TGAGCAAGGTGTGAGTGTGCGCCATGG |
| Al3     | GAAAGCATGGATCCGCCTAGGCTGTCCCAGT                              | TGAGCAAGGTGTGAGTGTGCGCCATGG |
| Ap1     | GAAAGCATGGATCTGCCTAGGCTGTCCCAGGG                             | TGAGCAAGGTGTGAGTGTGCGT      |
| Ap2     | GAAAGCATGGATCTGCCTAGGCTGTCCCAGGG                             | TGAGCAAGGTGTGAGTGTGCGT      |
| Ap3     | GAAAGCATGGATCTGCCTAGGCTGTCCCAGGG                             | TGAGCAAGGTGTGAGTGTGCGT      |
| Ap4     | GAAAGCATGGATCTGCCTAGGCTGTCCCAGGG                             | TGAGCAAGGTGTGAGTGTGCGT      |
|         | *****                                                        | *****                       |

|         | 130                                                            |
|---------|----------------------------------------------------------------|
| At_VARA | GCATCGACACCTTGCGGCTAGGAACCTGGAACGAGACGGGTGGCAAAGATTTTCGAGTAGCA |
| At_VARB | GCATCGACACCTTGCGGCTAGGAACCTGGAACGAGACGGGTAGCAAAGATTTTCGAGTAGCA |
| Ac1     | GCATCGACACCTTGCGTCTTTGAACGGAACGAA--GGTAAGCAGAGGATT-----G-A     |
| Ah1     | GCATCGACACCTTGCGGCTTGAACGGAACGGA--GGTAAGCACAGGATT-----GTA      |
| Ah2     | GCATCGACACCTTGCGGCTTGAACGGAACGGA--GGTAAGCACAGGATT-----GTA      |
| Al1     | GCATCGACACCTTGCGGCTTTGAACGAAACGGA--GGTACGCGCAGCTGT-----TA      |
| Al2     | GCATCGACACCTTGCGGCTTTGAACGAAACGGA--GGTACGCGCAGCTGT-----TA      |
| Al3     | GCATCGACACCTTGCGGCTTTGAACGAAACGGA--GGTACGCGCAGCTGT-----TA      |
| Ap1     | GCATCGACACCTTGCGTCTTTGAACGGAAGCGAA--GGTAAGCGGATGATT-----G-A    |
| Ap2     | GCATCGACACCTTGCGTCTTTGAACGGAAGCGAA--GGTAAGCGGATGATT-----G-A    |
| Ap3     | GCATCGACACCTTGCGTCTTTGAACGGAAGCGAA--GGTAAGCGGATGATT-----G-A    |
| Ap4     | GCATCGACACCTTGCGTCTTTGAACGGAAGCGAA--GGTAAGCGGATGATT-----G-A    |
|         | *****                                                          |

|         |               |                                                      |
|---------|---------------|------------------------------------------------------|
| At_VARA | CTTCATAC      | TACCGTGGGTTTTTTAAACCTTCC--GAGTTTTGTTGATGTTATTCCGAGAA |
| At_VARB | CTTCATAC      | TACCGTGGGTTTTTTAAACCTTCCCTAGTTTTGTTGATGTTATTCCGAGAA  |
| Ac1     | CGACGAGC----- | GGGTCTCTCGGTGTTT--TCTAGTTTACCTTTAGC-----             |
| Ah1     | CGCCGAGC----- | GGGTGTCTTGGAGTCA--TCCAGTTTACCTTTTGC-----             |
| Ah2     | CGCCGAGC----- | GGGTGTCTTGGAGTCA--TCCAGTTTACCTTTTGC-----             |
| Al1     | CGTCGTGCA---- | GGGTTTTCTCGGCGTCACTTCTAG--CGGCTTTTGC-----            |
| Al2     | CGTCGTGCA---- | GGGTTTTCTCGGCGTCACTTCTAG--CGGCTTTTGC-----            |
| Al3     | CGTCGTGCA---- | GGGTTTTCTCGGCGTCACTTCTAG--CGGCTTTTGC-----            |
| Ap1     | CGACGAGC----- | GGGTCTCTCGGAGTTG--TCTAGTTTACCTTTTGC-----             |
| Ap2     | CGACGAGC----- | GGGTCTCTCGGAGTTG--TCTAGTTTACCTTTTGC-----             |
| Ap3     | CGACGAGC----- | GGGTCTCTCGGAGTTG--TCTAGTTTACCTTTTGC-----             |
| Ap4     | CGACGAGC----- | GGGTCTCTCGGAGTTG--TCTAGTTTACCTTTTGC-----             |
|         | * * *         | *****                                                |

|         |                           |                                                 |
|---------|---------------------------|-------------------------------------------------|
| At_VARA | TTAGCAAACCGTAACGAAGATGTTT | TTGGCAACCATCTTTTGATGGGAGTCCGGCTGTT              |
| At_VARB | TTAGCAAACCGTAACGAAGATGTTT | TTGGCAACCATCTTTTGATGGGAGTCCGGCTGTT              |
| Ac1     | -----                     | GGATGTTCTTTGGCAACCATCTTTTCGATGGGAA--GTGGATA--T  |
| Ah1     | -----                     | GGATGTTT--ATGGCAACCATCTTTTGATGGGAA--GTGGATA--T  |
| Ah2     | -----                     | GGATGTTT--ATGGCAACCATCTTTTGATGGGAA--GTGGATA--T  |
| Al1     | -----                     | GGATGTTT--TTGGCAACCATCTTTTGATGGGGAAGTGGATA--T   |
| Al2     | -----                     | GGATGTTT--TTGGCAACCATCTTTTGATGGGGAAGTGGATA--T   |
| Al3     | -----                     | GGATGTTT--TTGGCAACCATCTTTTGATGGGGAAGTGGATA--T   |
| Ap1     | -----                     | GGATGTTT--TTGGCAACCATCTTTTCGATGGGAA--GTGGATA--T |
| Ap2     | -----                     | GGATGTTT--TTGGGAACCATCTTTTCGATGGGAA--GTGGATA--T |
| Ap3     | -----                     | GGATGTTT--TTGGCAACCATCTTTTCGATGGGAA--GTGGATA--T |
| Ap4     | -----                     | GGATGTTT--TTGGCAACCATCTTTTCGATGGGAA--GTGGATA--T |
|         | *****                     | *****                                           |

|         |                        |                                     |
|---------|------------------------|-------------------------------------|
| At_VARA | CGATAGCCGGCC-----AAGG  | GTGATGAACGAAATGTGAACCCTTGTCTCGCCTAG |
| At_VARB | CGAAAGCCGGCC-----AAGG  | GTGATGAACGAAATGTGAACCCTTGTCTC-----  |
| Ac1     | CGGAAGTCAGTCTTTGGACCG  | AGAAGTGAC--ACGAAGT-----ACCCAG       |
| Ah1     | CGGAAGTCAGTCTTT-GACCGT | GAAGTGCC--ATGAAGT-----TCCCAG        |
| Ah2     | CGGAAGTCAGTCTTT-GACCGT | GAAGTGCC--ATGAAGT-----TCCCAG        |
| Al1     | CGG-----CT-GGT-----    | AGTGAC--ACGAGGC-----TCCC-G          |
| Al2     | CGG-----CT-GGT-----    | AGTGAC--ACGAGGC-----TCCC-G          |
| Al3     | CGG-----CT-GGT-----    | AGTGAC--ACGAGGC-----TCCC-G          |
| Ap1     | CGGAAGTCAGTCTTTGGACCG  | AGAAGTTAC--ACGAAGT-----ACCCAG       |
| Ap2     | CGGAAGTCAGTCTTTGGACCG  | AGAAGTTAC--ACGAAGT-----ACCCAG       |
| Ap3     | CGGAAGTCAGTCTTTGGACCG  | AGAAGTTAC--ACGAAGT-----ACCCAG       |
| Ap4     | CGGAAGTCAGTCTTTGGACCG  | AGAAGTTAC--ACGAAGT-----ACCCAG       |
|         | *          *  *        | **          *  **                   |

|         |                     |                                            |
|---------|---------------------|--------------------------------------------|
|         |                     | C3 repeat                                  |
| At_VARA | GTTGGATGGGCGTGCTT   | CGTTGGAAAGCATGGATCCGCCTAGGCTGTCCCAGTGTGAGC |
| At_VARB | -----               | -----                                      |
| Ac1     | GCTTTGTGTGTAACCTCCG | -----                                      |
| Ah1     | GCTTTGTGTATAACTTCCG | -----                                      |
| Ah2     | GCTTTGTGTATAACTTCCG | -----                                      |
| Al1     | GTCTTGTGTGTATCCTTCG | -----                                      |
| Al2     | GTCTTGTGTGTATCCTTCG | -----                                      |
| Al3     | GTCTTGTGTGTATCCTTCG | -----                                      |
| Ap1     | GCTTTGTGCGTAACCTCCG | -----                                      |
| Ap2     | GCTTTGTGCGTAACCTCCG | -----                                      |
| Ap3     | GCTTTGTGCGTAACCTCCG | -----                                      |
| Ap4     | GCTTTGTGCGTAACCTCCG | -----                                      |
|         | **          *       |                                            |

|         |                                                               |                       |
|---------|---------------------------------------------------------------|-----------------------|
|         |                                                               | C2 repeat             |
| At_VARA | GAGGTGTGAGTGTGCGCCCATGGGCATCGACACCTTGCGGCTAGGAACTGGAACGAGACGG |                       |
| At_VARB | -----                                                         |                       |
| Ac1     | -----                                                         | CAC--TGCGGCTACGA----- |
| Ah1     | -----                                                         | GAC--TGCGGCTTCGA----- |
| Ah2     | -----                                                         | GAC--TGCGGCTTCGA----- |
| Al1     | -----                                                         | CAC--TGCGGCTCCGA----- |
| Al2     | -----                                                         | CAC--TGCGGCTCCGA----- |
| Al3     | -----                                                         | CAC--TGCGGCTCCGA----- |
| Ap1     | -----                                                         | CAC--TGCGGCTACGA----- |
| Ap2     | -----                                                         | CAC--TGCGGCTACGA----- |
| Ap3     | -----                                                         | CAC--TGCGGCTACGA----- |
| Ap4     | -----                                                         | CAC--TGCGGCTACGA----- |

|         |                                                               |
|---------|---------------------------------------------------------------|
| At_VARA | GTAGCAAAGATTTTCGAGTAGCACTTCATACTACCGTGGGTTTTTTAAACCTTCCTAGTTT |
| At_VARB | -----                                                         |
| Ac1     | -----                                                         |
| Ah1     | -----                                                         |
| Ah2     | -----                                                         |
| Al1     | -----                                                         |
| Al2     | -----                                                         |
| Al3     | -----                                                         |
| Ap1     | -----                                                         |
| Ap2     | -----                                                         |
| Ap3     | -----                                                         |
| Ap4     | -----                                                         |

|         |                                                             |
|---------|-------------------------------------------------------------|
| At_VARA | TGTTGATGTTATTCCGAGAATTAGCAAACCGTAACGAAGATGTTCTTGGAACCATCTTT |
| At_VARB | -----                                                       |
| Ac1     | -----                                                       |
| Ah1     | -----                                                       |
| Ah2     | -----                                                       |
| Al1     | -----                                                       |
| Al2     | -----                                                       |
| Al3     | -----                                                       |
| Ap1     | -----                                                       |
| Ap2     | -----                                                       |
| Ap3     | -----                                                       |
| Ap4     | -----                                                       |

|         |                                                               |
|---------|---------------------------------------------------------------|
| At_VARA | TGATGGGAGTCCGGCTGTTTCGAAAGCCGGCCAAGGGTGATGAACGAAATGTGAACCCTTG |
| At_VARB | -----                                                         |
| Ac1     | -----TATTCGCA-----                                            |
| Ah1     | -----TATTCGCA-----                                            |
| Ah2     | -----TATTCGCA-----                                            |
| Al1     | -----TATTCGCA-----                                            |
| Al2     | -----TATTCGCA-----                                            |
| Al3     | -----TATTCGCA-----                                            |
| Ap1     | -----TATTCGCA-----                                            |
| Ap2     | -----TATTCGCA-----                                            |
| Ap3     | -----TATTCGCA-----                                            |
| Ap4     | -----TATTCGCA-----                                            |

|         |       |                                                           |       |
|---------|-------|-----------------------------------------------------------|-------|
|         |       | C3 repeat                                                 |       |
| At_VARA | TCTC  | GCCTAGGTTGGATGGGCGTGCTTCGTTGGAAAGCATGGATCCGCCTAGGCTGTCC   | CC    |
| At_VARB | ----  | GCCTAGGTTGGATGGGCGTGCTTCGTTGGAAAGCATGGATCCGCCTAGGCTGTACCC |       |
| Ac1     | ----  | GCCTAGGTTGGATGGGCGTGC-----GAAAGCATGGATCCGCCTAGGCTGTCTT    |       |
| Ah1     | ----  | GCCTAGGTTGGATGGGCGTGC-----GAAAGCATAGATCCGCCTAGGCTGTCC     |       |
| Ah2     | ----  | GCCTAGGTTGGATGGGCGTGC-----GAAAGCATAGATCCGCCTAGGCTGTCC     |       |
| Al1     | ----  | GCCTAGGTTGGATGGGCGTGC-----GAAAGCATGGATCTGCCTAGGCTGTCTC    |       |
| Al2     | ----  | GCCTAGGTTGGATGGGCGTGC-----GAAAGCATGGATCTGCCTAGGCTGTCTC    |       |
| Al3     | ----  | GCCTAGGTTGGATGGGCGTGC-----GAAAGCATGGATCTGCCTAGGCTGTCTC    |       |
| Ap1     | ----  | GCCTAGGTTGGATGGGCGTGC-----TAAAGCATGGATCCGCCTAGGCTGTCTT    |       |
| Ap2     | ----  | GCCTAGGTTGGATGGGCGTGC-----TAAAGCATGGATCCGCCTAGGCTGTCTC    |       |
| Ap3     | ----  | GCCTAGGTTGGATGGGCGTGC-----TAAAGCATGGATCCGCCTTGGCTGTCTT    |       |
| Ap4     | ----  | GCCTAGGTTGGATGGGCGTGC-----TAAAGCATGGATCCGCCTAGGCTGTCTT    |       |
|         | ***** |                                                           | ***** |

|         |            |                                                       |    |
|---------|------------|-------------------------------------------------------|----|
|         |            | P-site                                                |    |
| At_VARA | GA-AGT     | ATCTCGCGCTTGACGGCTTTGGCTCGGATTCGTCCGTCTTCTTTCTTCTTAGC |    |
| At_VARB | GAAGGT     | ATCTCGCGCTTGACGGCTTTGGCTCGGATTCGTCCGTCTTCTTTCTTCTTAGC |    |
| Ac1     | GACGGTTTTT | TCGCGCTTGTCGGCTTTGGCTTGGATTCGTCCGTCTTCTCTCTTCTCAGC    |    |
| Ah1     | GACGGTTTTT | TCGCGCTTGTCGGCTTTGGCTTGGATTCGTCCGTCTTCTCTCTTCTCAGC    |    |
| Ah2     | GACGGTTTTT | TCGCGCTTGTCGGCTTTGGCTTGGATTCGTCCGTCTTCTCTCTTCTCAGC    |    |
| Al1     | GACGGTTTTT | TCGCGCTTGTCGGCTTTGGCTTGGATTCGTCCGTCTTCTCTCTTCTCAGC    |    |
| Al2     | GACGGTTTTT | TCGCGCTTGTCGGCTTTGGCTTGGATTCGTCCGTCTTCTCTCTTCTCAGC    |    |
| Al3     | GACGGTTTTT | TCGCGCTTGTCGGCTTTGGCTTGGATTCGTCCGTCTTCTCTCTTCTCAGC    |    |
| Ap1     | GACGGTTTTT | TCGCGCTTGTCGGCTTTGGCTTGGATTCGTCCGTCTTCTCTCTTCTCAGC    |    |
| Ap2     | GACGGTTTTT | TCGCGCTTGTCGGCTTTGGCTTGGATTCGTCCGTCTTCTCTCTTCTCAGC    |    |
| Ap3     | GACGGTTTTT | TCGCGCTTGTCGGCTTTGGCTTGGATTCGTCCGTCTTCTCTCTTCTCAGC    |    |
| Ap4     | GACGGTTTTT | TCGCGCTTGTCGGCTTTGGCTTGGATTCGTCCGTCTTCTCTCTTCTCAGC    |    |
|         | **         |                                                       | ** |
