# Supplementary material for: 45S rDNA Diversity In Natura as One Step towards Ribosomal Heterogeneity in Arabidopsis thaliana
Source: MDPI journal article supplement (doi:10.3390/plants12142722), 2023-07-21

**Figure S4:** 45S rRNA gene polymorphisms in At66. **(A)** 45S rRNA gene polymorphisms while selecting either the 115 individuals out of 173 sharing the same 5R1 genotype or the 92 individuals out of 173 sharing the same 3R1 genotype. **(B)** 45S rRNA gene polymorphisms for the 6 localities in the order of the altitudinal gradient from 0 to 1900 m (Mas Larrieu, Massane, Mosset, Py1000, Mantet and Py1900). Proportion of individuals of At66 with an alternative allele (defined as >5% within an individual) along the 45S rRNA gene. Vertical lines represent single nucleotide polymorphisms or deletions in the ETS (gray), 18S (red), ITS (green), 5.8S (orange), and 25S (blue) regions along the 45S rRNA gene. Black vertical lines represent insertions.

45S rRNA polymorphisms for individuals sharing the 5R1 genotype

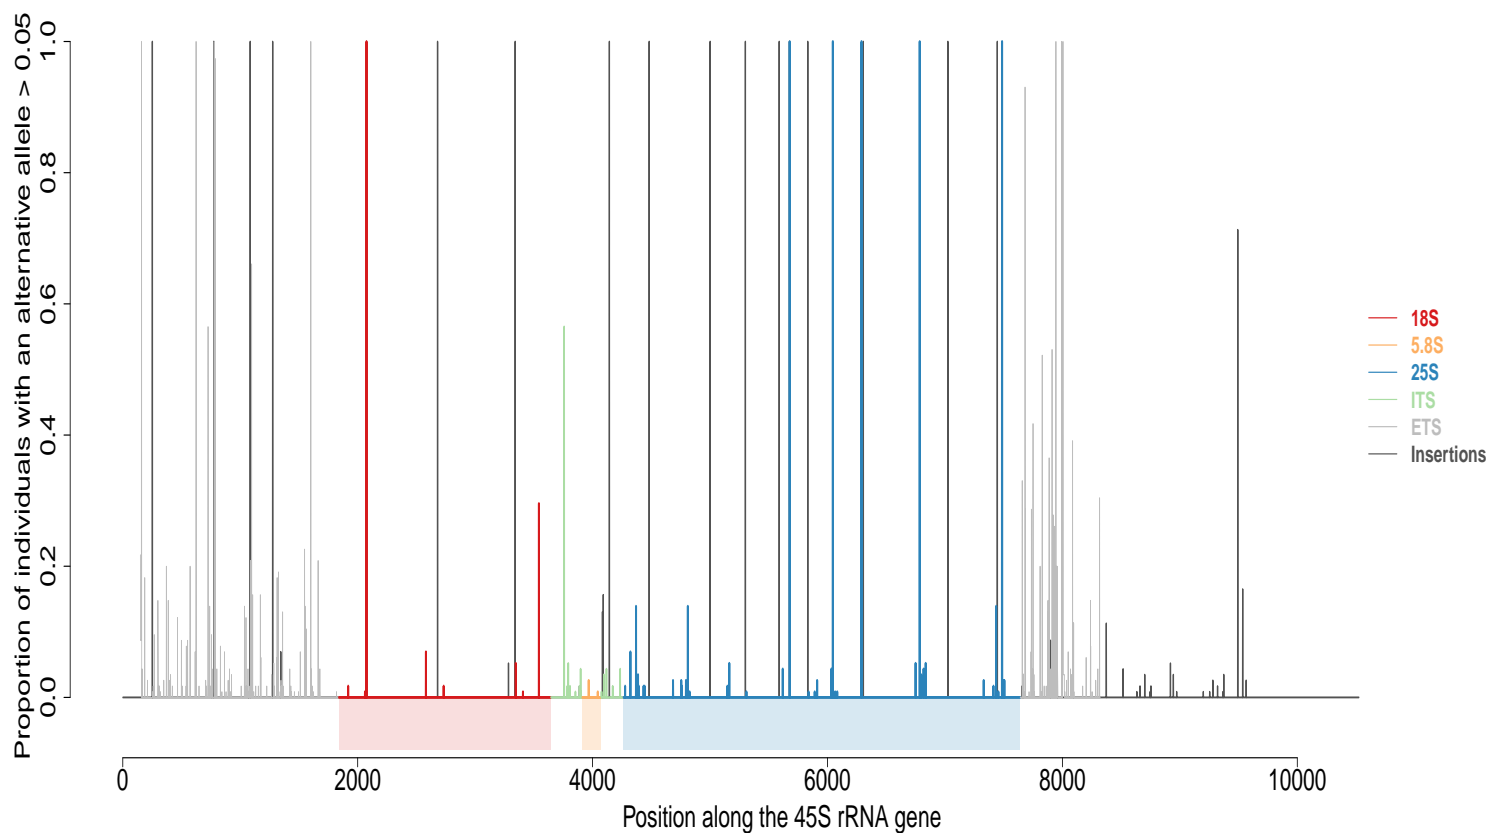

45S rRNA polymorphisms for individuals sharing the 3R1 genotype

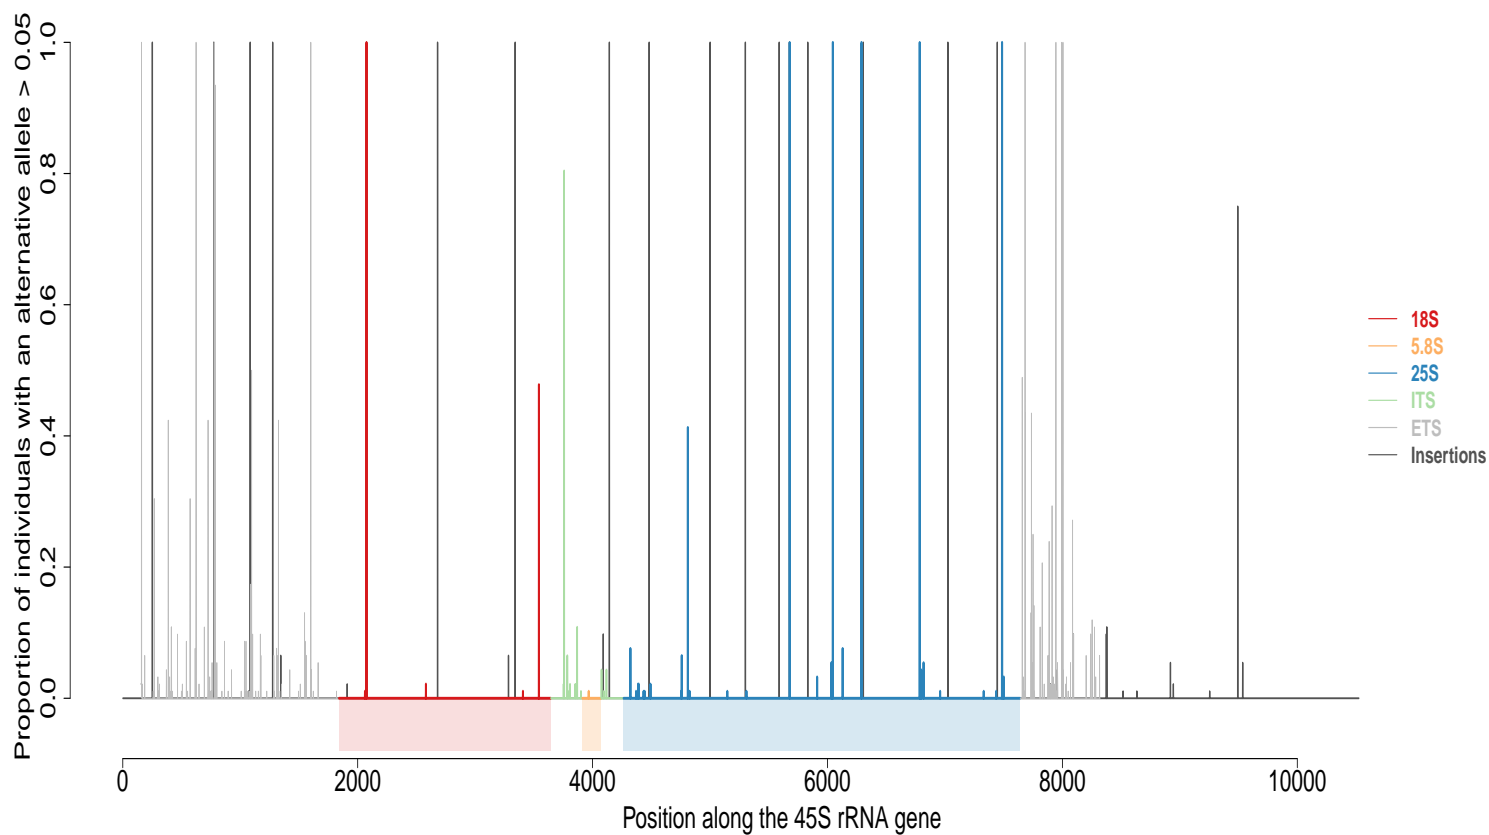

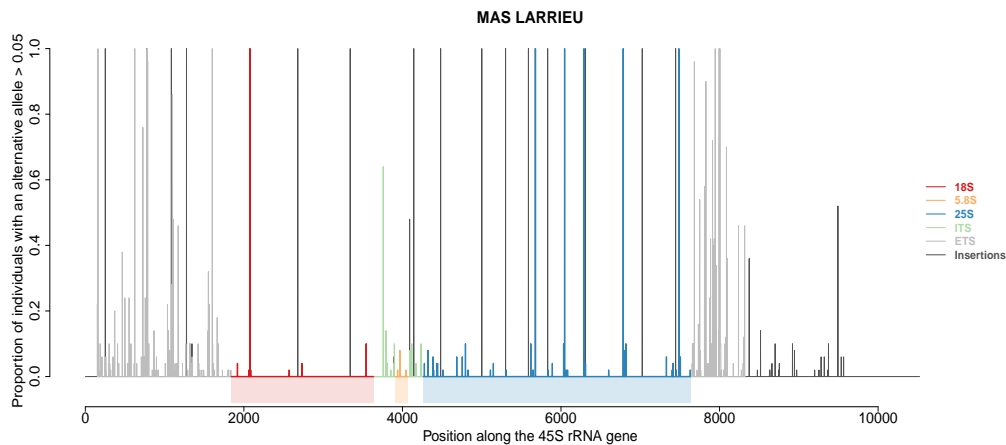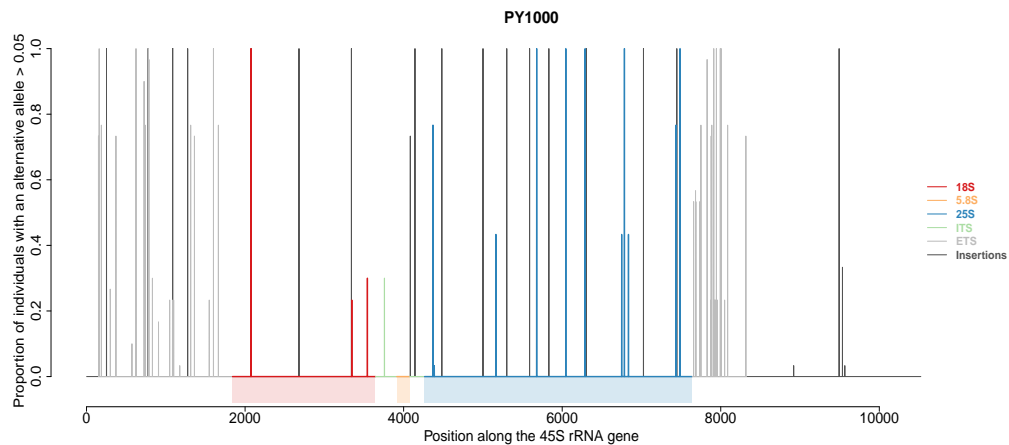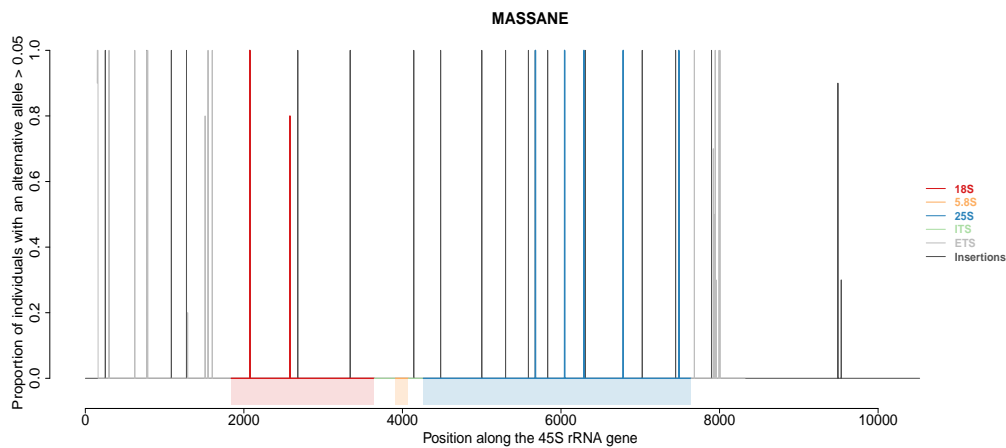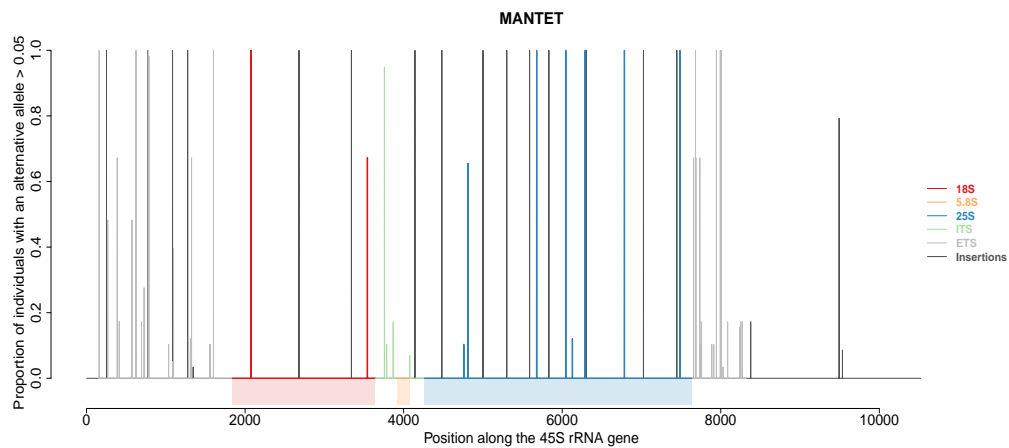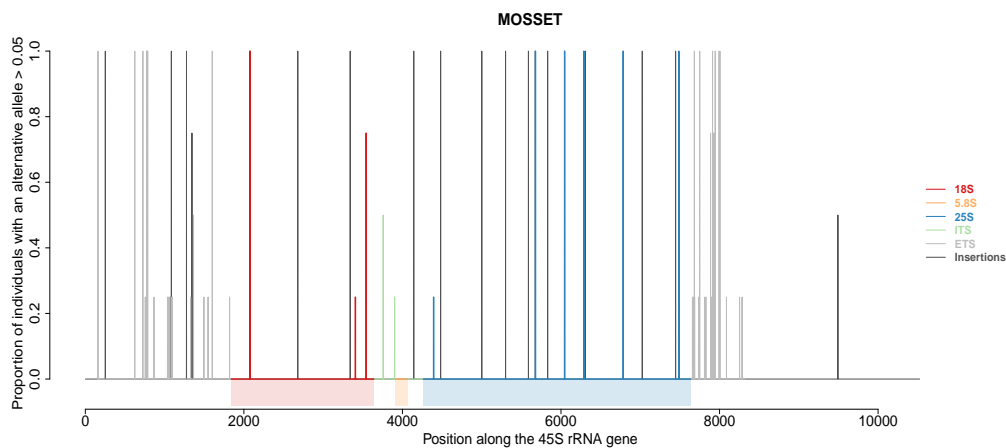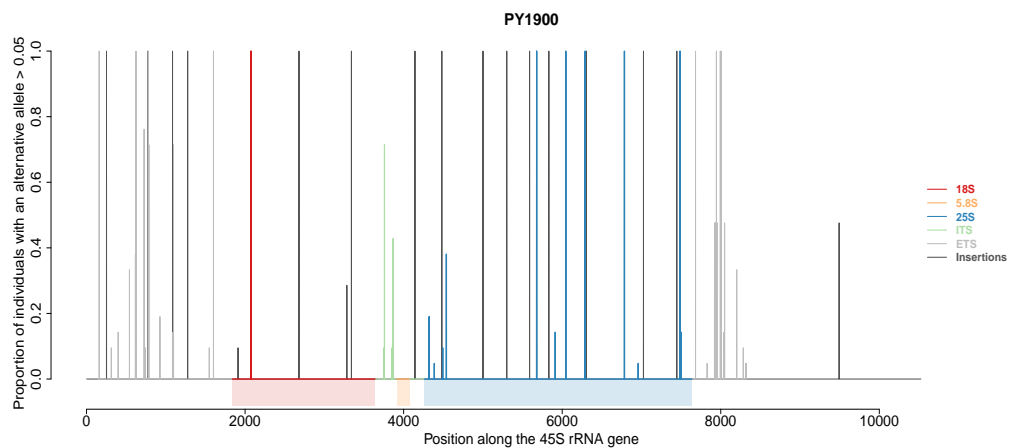

Supplement: s1 [file s1]
