# Supplementary material for: 45S rDNA Diversity In Natura as One Step towards Ribosomal Heterogeneity in Arabidopsis thaliana
Source: MDPI journal article supplement (doi:10.3390/plants12142722), 2023-07-21
Supplement: s1 [file s1]

**Figure S5:** GWAS analysis using 45S rDNA copy number variation as a phenotype. Genome-wide association study (GWAS) conducted by GAPIT version 3 using BLINK and FarmCPU multi-loci models, providing both 18S and 25S CNVs as a phenotype, SNP information as a hapmap format and a kinship matrix. For both FarmCPU and BLINK, the first three principal components were fitted as covariate variable to reduce the false positive due to population structure. **(A)** The QQ plots represent the deviation of the observed  $p$ -values from the null hypothesis: the observed  $p$ -values for each SNP are sorted from largest to smallest and plotted against expected values from a theoretical  $\chi^2$ -distribution. When there is no association with the trait, observed values correspond to the expected values and all points are on or near the middle line between the x-axis and the y-axis (red and gray shadowed line highlights the null hypothesis). When observed  $p$ -values are clearly more significant than expected under the null hypothesis, points will move towards the y-axis. Accounting for population structure and kinship relatedness, the BLINK model performs slightly better than the FarmCPU model. **(B)** Manhattan plots summarizing genome-wide association results along the five chromosomes of *Arabidopsis thaliana*. Each SNP outliers above the genome-wide significance threshold is colored depending on its chromosome location. The genome-wide significance threshold set at  $-\log_{10}(0.01/\text{total number of SNPs})$  is indicated as a gray line. **(C)** Table recording significant SNP outliers. We only looked for candidate genes using TAIR10 when SNP outliers were either shared by both models and CNVs or one model only but both CNVs.

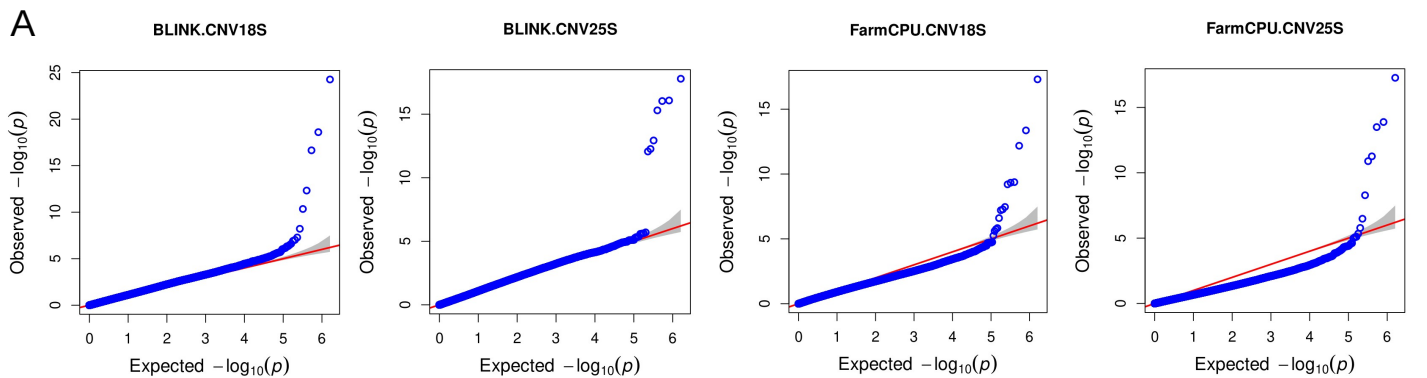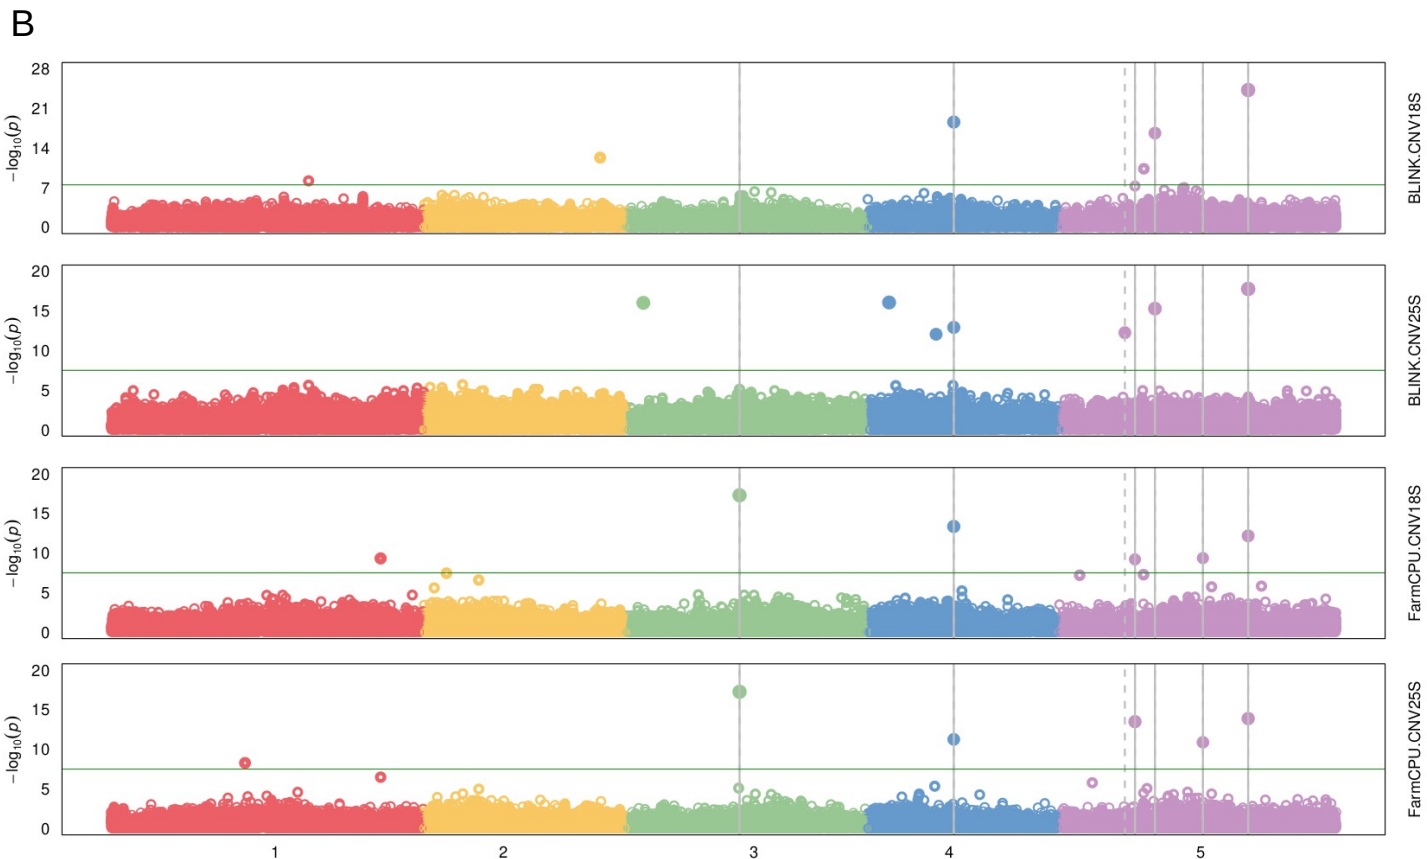

**C**

| Outliers | SNP         | Chr | Pos      | P.value      | MAF        | traits         | REF allele | alternate allele | TAIR10             | Function                                                      |
|----------|-------------|-----|----------|--------------|------------|----------------|------------|------------------|--------------------|---------------------------------------------------------------|
| 151631   | S1_13031063 | 1   | 13031063 | 5.235169e-09 | 0.2456647  | FarmCPU.CNV25S |            |                  |                    |                                                               |
| 257106   | S1_19212393 | 1   | 19212393 | 6.090339e-09 | 0.4421965  | BLINK.CNV18S   |            |                  |                    |                                                               |
| 378779   | S1_26223191 | 1   | 26223191 | 4.655183e-10 | 0.1849711  | FarmCPU.CNV18S |            |                  |                    |                                                               |
| 652966   | S2_17143203 | 2   | 17143203 | 4.725909e-13 | 0.2456647  | BLINK.CNV18S   |            |                  |                    |                                                               |
| 687414   | S3_1649985  | 3   | 1649985  | 9.303996e-17 | 0.06647399 | BLINK.CNV25S   |            |                  |                    |                                                               |
| 788071   | S3_11005534 | 3   | 11005534 | 4.991114e-18 | 0.2196532  | FarmCPU.CNV18S | C          | A                | AT3G29000 promoter | calcium binding protein 2 EF hands group IV                   |
| 788071   | S3_11005534 | 3   | 11005534 | 5.432796e-18 | 0.2196532  | FarmCPU.CNV25S |            |                  |                    |                                                               |
| 1025237  | S4_2088089  | 4   | 2088089  | 8.402371e-17 | 0.46820809 | BLINK.CNV25S   |            |                  |                    |                                                               |
| 1102853  | S4_6658773  | 4   | 6658773  | 8.615701e-13 | 0.44797688 | BLINK.CNV25S   |            |                  |                    |                                                               |
| 1136450  | S4_8378198  | 4   | 8378198  | 2.512182e-19 | 0.2456647  | BLINK.CNV18S   | T          | C                | AT4G14600          | SFT11, secretory system, Qc-SNARES, plant SFT clade, golgi    |
| 1136450  | S4_8378198  | 4   | 8378198  | 1.174424e-13 | 0.24566474 | BLINK.CNV25S   |            |                  |                    |                                                               |
| 1136450  | S4_8378198  | 4   | 8378198  | 4.319601e-14 | 0.2456647  | FarmCPU.CNV18S |            |                  |                    |                                                               |
| 1136450  | S4_8378198  | 4   | 8378198  | 5.531750e-12 | 0.2456647  | FarmCPU.CNV25S |            |                  |                    |                                                               |
| 1294251  | S5_6433284  | 5   | 6433284  | 5.477141e-13 | 0.09826590 | BLINK.CNV25S   |            |                  |                    |                                                               |
| 1308501  | S5_7415940  | 5   | 7415940  | 6.234884e-10 | 0.4710983  | FarmCPU.CNV18S |            |                  |                    |                                                               |
| 1308501  | S5_7415940  | 5   | 7415940  | 3.202730e-14 | 0.4710983  | FarmCPU.CNV25S |            |                  |                    |                                                               |
| 1321683  | S5_8278561  | 5   | 8278561  | 4.521547e-11 | 0.3786127  | BLINK.CNV18S   |            |                  |                    |                                                               |
| 1338491  | S5_9357427  | 5   | 9357427  | 2.241704e-17 | 0.1473988  | BLINK.CNV18S   |            |                  |                    |                                                               |
| 1338491  | S5_9357427  | 5   | 9357427  | 5.039445e-16 | 0.14739884 | BLINK.CNV25S   |            |                  |                    |                                                               |
| 1432465  | S5_14024546 | 5   | 14024546 | 4.206914e-10 | 0.1618497  | FarmCPU.CNV18S | T          | C                | AT5G26622          | Beta-galactosidase related protein, glycosyl hydrolase family |
| 1432465  | S5_14024546 | 5   | 14024546 | 1.296281e-11 | 0.1618497  | FarmCPU.CNV25S |            |                  |                    |                                                               |
| 1515507  | S5_18423239 | 5   | 18423239 | 5.433961e-25 | 0.0867052  | BLINK.CNV18S   | G          | C                | AT5G45470          | unknown function, family of uncharacterized protein DUF594    |
| 1515507  | S5_18423239 | 5   | 18423239 | 1.640678e-18 | 0.08670520 | BLINK.CNV25S   |            |                  |                    |                                                               |
| 1515507  | S5_18423239 | 5   | 18423239 | 6.583878e-13 | 0.0867052  | FarmCPU.CNV18S |            |                  |                    |                                                               |
| 1515507  | S5_18423239 | 5   | 18423239 | 1.306315e-14 | 0.0867052  | FarmCPU.CNV25S |            |                  |                    |                                                               |
