# Supplementary material for: 45S rDNA Diversity In Natura as One Step towards Ribosomal Heterogeneity in Arabidopsis thaliana
Source: MDPI journal article supplement (doi:10.3390/plants12142722), 2023-07-21
Supplement: s1 [file s1]

**Figure S6:** 5'ETS variation in additional species of Brassicaceae Lineage I, Clade A.

**(A)** 5'ETS genotyping in Cv, *Chrysochamela velutina*, Dm, *Descurainia millefolia*, Cp, *Cardamine parviflora*, Bs, *Boechera stricta*, Lc, *Lepidium campestre* compared to At, *Arabidopsis thaliana*, Rs, *Raphanus sativus* and Br-r, *Brassica rapa ssp rapa*. \* uncloned amplified PCR products. Sizes in base pairs are labeled alongside the lane of the 1kb<sup>+</sup> DNA ladder. **(B)** Schematic representation of variants containing an insertion splitting away the conserved U3 snoRNP binding site A<sup>123</sup>B from the primary processing site P. **(C)** Schematic representation of insertion free variants. Dotted lines indicate deletions and a number of base pairs between brackets indicates the size of an inserted sequence without any homology with known D or C repeats. **(D)** Multiple Sequence Comparison by Log- Expectation (MUSCLE) alignments of 5'ETS insertion free variants. *Brassica oleracea* (Bo), *Arabidopsis cebennensis* (Ac2) and *Lepidium campestre* (Lc2). **(E)** Fasta sequences of 5'ETS variants.

Brassicaceae Lineage I, Clade A, Camelinae

Cv1 and Cv2 are supported by two independent clones whereas Cv3 sequence was only cloned once for *Chrysochamela velutina*.

Brassicaceae Lineage I, Clade A, Boechereae

Bs is the 100% identity sequence supported by two independent clones for *Boechera stricta*.

Brassicaceae Lineage I, Clade A, Cardamineae

Cp is the common sequence shared by two independent clones for *Cardamine parviflora*.

Brassicaceae Lineage I, Clade A, Descurainieae

Dm is the 100% identity sequence shared by three independent clones for *Descurainia millefolia*.

Brassicaceae Lineage I, Clade A, Lepidieae

Lc1 and Lc2 are both only supported by one clone for *Lepidium campestre*.

Supplementary result description

Longest variants were found in *Chrysochamela velutina* and *Lepidium campestre*, intermediate variants were identified in *Chrysochamela velutina*, *Descurainia millefolia*, *Cardamine parviflora*, *Boechera stricta*, insertion free variant was abundant in *Lepidium campestre* and only faintly detectable in *Boechera stricta* and *Chrysochamela velutina*. In addition to the deletion of the D1a repeat identified in the *Arabidopsis* genus, the major variant identified in *Boechera stricta* has a truncated version of D1b, complete loss of D2a, partial loss of D12 but still D2b and a truncated C-like repeat. When present in Brassicaceae species, the insertion either retains partially some homologies with some D and C repeats (*Boechera stricta*, *Lepidium campestre*, *Chrysochamela velutina*) and/or interrupt them by insertions (*Chrysochamela velutina*) or share no homology with any of them (*Cardamine parviflora*, *Descurainia millefolia*). Illustrating some of these statements for *Chrysochamela velutina*, we identified two major variants of 1912 bp (Cv1) and 552 bp (Cv3) while genotyping and an additional rare variant of 946 bp (Cv2) after cloning and sequencing. Surprisingly, all Cv variants have an insertion separating D repeats from the C like repeat, the length of this insertion vary from 72 bp in Cv1-2 to 525 bp in Cv3. Cv1-2 variants have a truncated D1b repeat while Cv3 retained both D1b and D2a. Contrary to Cv1, Cv2-3 retained the additional third occurrence of the C3 repeat but an insertion of 51 bp separate it from the P site. There is an additional insertion separating the C-like repeat from either the primary processing site (Cv1, 110 bp) or the last C3 repeat occurrence (Cv2, 459 bp ; Cv3, 815 bp).

(A) 5'ETS genotyping in additional species of Brassicaceae Lineage I, Clade A

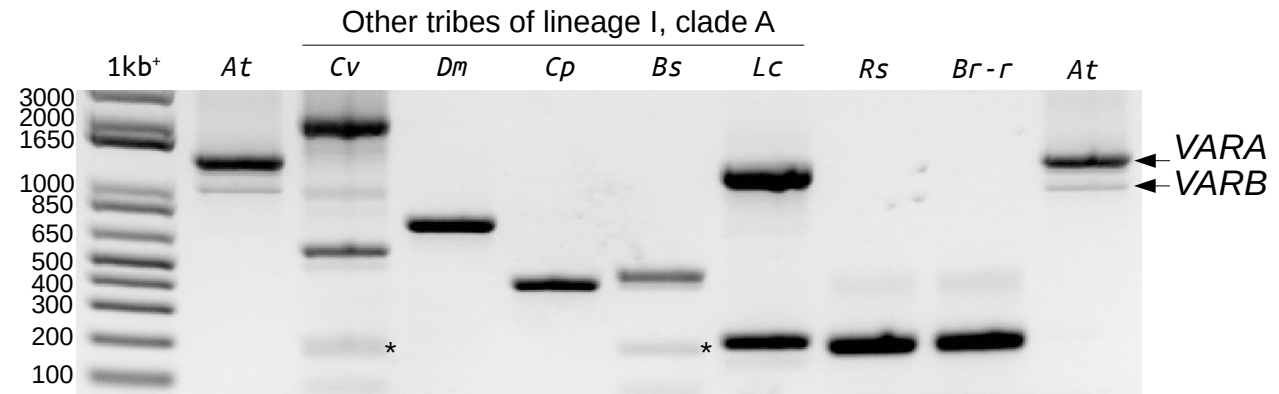

(B) Schedules of variants containing an insertion splitting away the conserved U3 snoRNP binding site A123B from the primary processing site P

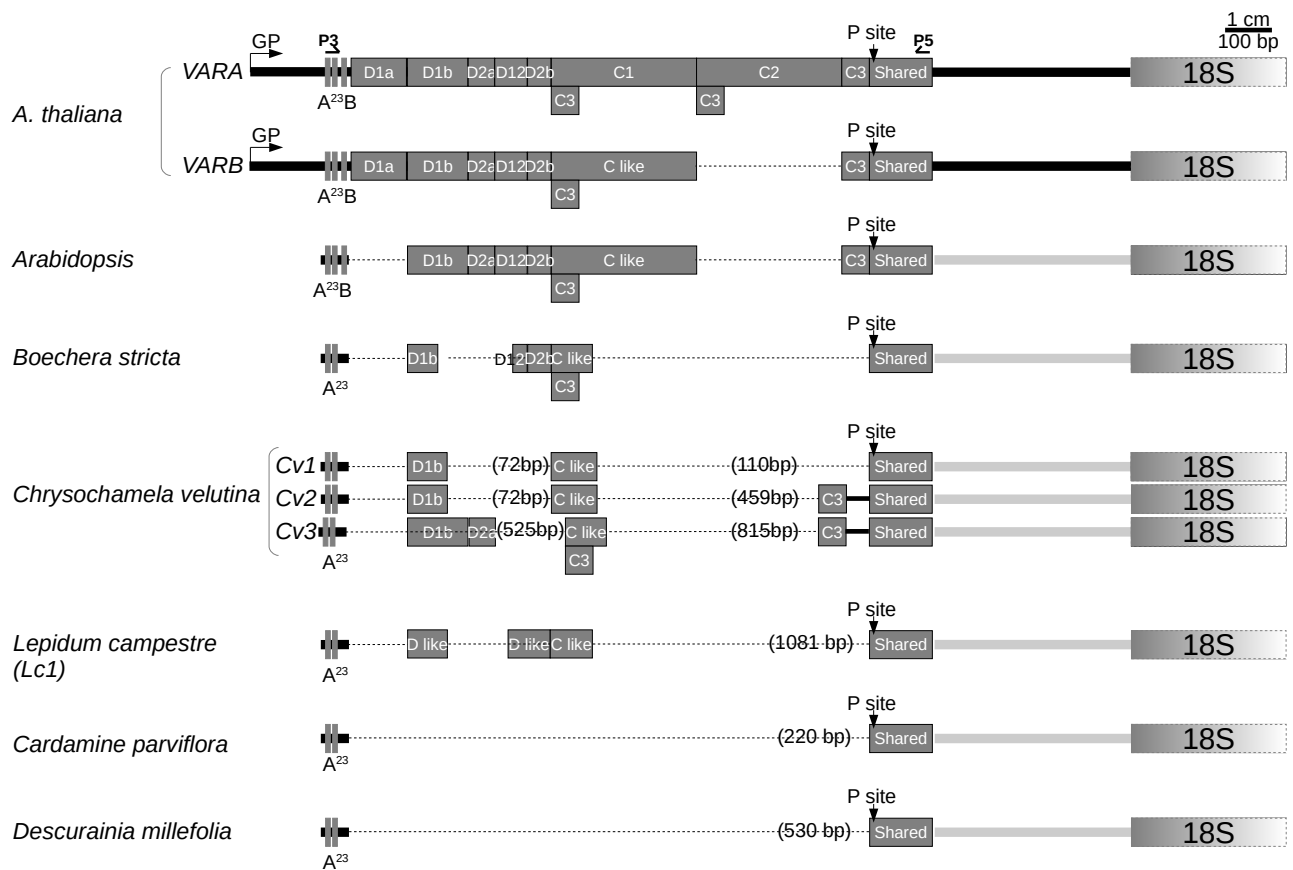

(C) Schedules of insertion free variants

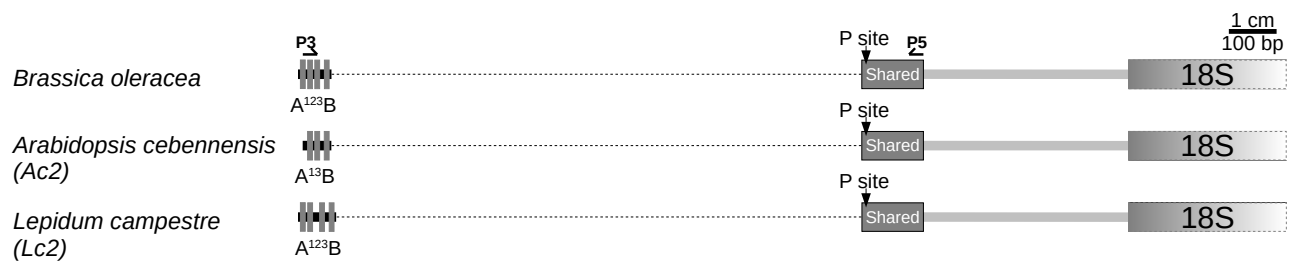

#### (D) MUSCLE alignment of 5'ETS insertion free variants

```

      A1      A2      A3      B
Ac2      CTTTTCCGGGCAC-----TTTTCCGGTGGACATTTTGCCCC
Lc2      CTTTTCCGGGCACTTTTCCGGCGACTTTCCGGCGAGTTTTCCGGTGGTTCATTTTCTTCC
Bo       CTTTTCCGGGCACTTTTCCGGCGAC-----TTTTCCGGTGGACATTTTGCCCC
          *****
          P-site & P motif
Ac2      TAAAATCAAAATTTTCGCGCTTGTGTGGTCTTGGCCTGGTTTCATCCGTCTTCCAGCTGCT
Lc2      C---TTTATTTTTCGCGCTTGTGCGGCTTTGGACTGGTTTCATTTGTCTTCTTATGCA
Bo       TAAAATCAAAATTTTCGCGCTTGTGTGGTCTTGGCCTGGTTTCATCCGTCTTCCAGCTGCT
          * * ***** ** *** ***** ***** ***
          CTTTTGATTACATCTCGAGAGTGGTTGGAAAGATTGATGTTAGCGGGGCAA-TGAACGTT
          TTTTCGATTATATCGAAAGAGTGGTTGGAAAGATTGATGTTAGCGGGCCAAC-TGAACGTT
          CTTTTGATTACATCTCGAGAGTGGTTGGAAAGATTGATGTTAGCGGGGCAATTGAACGTTG
          *** ***** ** ***** ***** *****
          CGGCGTATGAGTGGTGATCGG
          CGGCGTATGAGTGGTGATCGG
          CGGCGTATGAGTGGTGATCGG
          *****
```

#### (E) Fasta sequences of 5'ETS variants

>Cv1

```
CTTTTCCGGGCACTTTTCCGGCGGTCTGGTTTTTTTGCCTTTTCCGATTTTTTCCGGATTAATCGACGAAAGA
TGGTGAATGGCCGAGGAGAATGGGCGTGTCATGCATGGGCTGACATGGATTCTCCGAGGCCGAGGGTG
GAGGTATGTTCCGATGGGCCCCACGACATTACCTGATGTGCCATGCGCATCGTTACACCCCAAGCCGAA
CTGGATGGGCGTGCTCTGTTGGGGAGCATGGATCCAGTTTTTGGCCGTCCCGGGGGGATCAAGGTGGCG
ATGTCGCCCATGGGCAACGATCACCTTGTGGAAGGGTTCGGTAACGGAAATGGTTGCGGTAATGAAAAA
AATGGAAGCTGGCTCCCGTGTTTCGACAATCATCGATGTTTCGTCAATGGACATCGAACATTCTTAGGATTTG
TTTCTCGCGCTTGTGCGGCTTTGGCTTGGTCCGTCCGTCTTCACTTTGCTCGTCCGAATATTTCGGAAGG
GTGGGGGAATGATTGGTGGTTTTGGGTCAATTGAACGTTCCGGCGTATGAGTGGTGATCGG
```

>Cv2

```
CTTTTCCGGGCACTTTTCCGGCGGTCTGGTTTTTTTGCCTTTTCCGATTTTTTCCGGATTAATCGACGAAAGA
TGGTGAATGGCCGAGGAGAATGGGCGTGTCATGCATGGGCTCACATGGATTCTCCGAGGCCGAGGGTGG
AGGTATGTTCCGATGGGCCCCACGACATTACCTGATGTGCCATGCGCATCGTTACACCCCAAGCCGAAC
TGGATGGGCGTGCTCTGTTGGGGAGCATGGATCCAGTTTTTGGCCGTCCCGTGGGGATCAAGGTGGCGA
TGTCGCCCATGGGCAACGATCACCTTGTGGAAGGGTTCGGTAACGGGAATGGTTGCGGTAATGAAAAAA
ATGGAAGCTGGCTCCCGTGTTTCGACAATCATCGATGTTTCGTCAATGTAATCGATCCGGTCTGTTAGCCGATG
TTGGAGTAATTGCCGTAGCCTTCGACGTTTCTGTTCTGGGAACCATCGTTTGATGGGAGTCCGGGTTTTG
CAAAACCGGCCAAGGGTAATGAACGATTGTGAACCTTGTGCGCTAGTCGGATGGGCGTGCTTAGGTAG
CATGGATCCGGTTAAGCTTGCTGGCCCGTGAGGGGTCTCTTCAATCGGACTTCAGGCGTGCCGTAAGT
CGCACACAAGCATGTTGGACGTTGATTCGGAGATACCTACCGCAGCTCTCATAGATATTGCAGTCTATCGCC
TAGGTCGGATGGGCGTGCTTCGATGGAAGCATGGATCCGCCTAGGCTGTCCCGACGGTTACACAAGAT
GACGGTGTCTCCCATGGACATCGAACATTCTTAGGATTTGTTTCTCGCGCTTGTGCGGCTTTGGCTTGGT
CCGTCCGTCTTCACTTTGCTCGTCCGAATATTTCGGAAGGGTGGGGGAATGATTGGTGGTTTTGGGTCAA
TTGAACGTTCCGGCGTATGAGTGGTGATCGG
```

>Cv3

```
CTTTTCCGGGCACTTTTCCGGCGGTCTGGTTTTTTTGCCTTTTCCGATTTTTTCCGGATTAATCGACGAAAGA
TGGTGAATGGCCGAGGAGAATGGGCGTGTCATGCATGGGCTGACATGGATTCTCCGAGGCCGAGGGTG
GAGGTATGTTCCGATGGGCCCCACGACATTACCTGATGTGCCATGCGCATCGTTACACCCCAAGCCTAAC
TGGATGGGCGTGCTCTGTTGGGGAGCATGGATCCAGTTTTTGGCCGTCCCGGGGGGATCAAGGTGGCGA
TGTCGCCCATGGGCAACGATCACCTTGTGGAAGGGTTCGGTAACGAAATGGTTGCGGTAATGAAAGAAAT
GGAAGCTGGCTCCCGTGTTTCGACAATCATCGATGTTTCGTCAATGTAATCGATCCGGTCTGTTAGCCGATGTT
GGAGTAATTGCCGTAGCCTTCGTCTGTTGCTGAACCTGGGAACCATCGTTTGATGGGAGTCCGGACTTTCC
AAAGCCGGCCAAGGGTAATGAACGAATTGTGAACCTTGTTCATCGCCAAGTCGGATGGGCGTGCTTTGT
TGGAGAGCATGGATCCGGTTAGGCTGTCCGATGATTACTTAGTTGCGCGTGGTATTGCATGTCGAAGTGGC
TGGCCCGCGAGGTGTCTTCTTCAATCTCCCTTCAGACGTTCTGTTTCACGTACGTTTTGTTGGGAGTTGAT
CCGAGGATAACTACCGCAGCTCTCCTAGATATTGCACTCTATCGCCTAGGTTGGATGGGCGTGCTTTGTTG
GGAAGCATGGATCCGCCTAGGCCGTCCCGGGGGAAGCAAGGTGGCGATGTCGCCCATGGGCAAGATC
```

ACCTTGTGGCTAGGTTCAAGTAACGGGAAAGGTTGCGGTAATGAAGAAAATGGAAGCTGGCTACCGTGTTG  
GACAATCATCGATGTTTCGTCAATGTAATCGATCCGGTCGTTAGCCGATGTTGGAGAAAATTGCCGTAGCCTT  
CGTCGTTTCTGTTCCCTGGGAACCATCGTTTGATGGGAGTCCGGACTTTCCAAAGCCGGCCAAGGGTAATG  
AACGAATTGTGAACCCCTGTTTATCGCCAAGTCGGATGGGCGTGCTTTATTGGAGAGCATGGATCCGGTCA  
GGCTGTCCGATGGTTACTTAGTTGCGCGTGGGGATTTTCATATCGCCTAGGTTGGATGGGCGTGCTTTGTT  
GGGAAGCATGGATCCGCCTAGGCCGTCCCGGGGGAAGCAAGGTGGCGATGTCGCCCATGGGCAACGAT  
CACCTTGTGGCTAGGTTCAAGTAACGGAAAGGGTTGCGGTAATGAAGAAAATTGAAGCTTGCTCCCGTGTT  
CGACAATCATCGATGTTTCGTCAATGTAATCGATCCGGTCGTTAGCCGATGTTGGAGTAATTGCCGTAGCCT  
TCGACGTTTCTGTTCCCTGGGAACCATCGTTTGATGGGAGTCCGGGTTTTGCAAAACCGGCCAAGGGTAAT  
GAACGTATTGTGAACCCCTGTCGCCTAGTCGGATGGGCGTGCTTAGGTAGCATGGATCCGGTTAAGCTTGC  
TGGCCCGTGAGGGGTCTCTCTTCAATCGGACTTCAGGCGTGCCGTACTGCGCACACAAGCATGTTGGACG  
TTGATTCGGAGATACCTACCGCAGCTCTCATAGATATTGCAGTCTATCGCCTAGGTGCGGATGGGCGTGCTTC  
GATGGAAAAGCATGGATCCGCCTAGGCTGTCCCGACGGTTACACAGGATGACGGTGTCTCCCATGGACAT  
CGGACATTCTTAGGATTTGTTTTCTCGCGCTTGTGCGGCTTTGGCTTGGTTCCGTCCGTCTTCACTTTACTCG  
TCCGAATATTTTCGGAAGGGTGGGGGGAATGATTGGTGGTTTTGGGTCAATTGAACGTTCCGGCGTATGAGT  
GGTGATCGG

>Bs

CTTTTCCGGGCACTTTTCCGGCGGTCGGTTTTGTTGCCTTTTCTGGATTTTTTCGGCATTCTCGACGAAAG  
ATGGGGAGTGGCCGAGGATGCATGTGCGGACATGGATTCTTCGAGGCTTTGGGTGGCGGTACGTTCCGA  
GGGCAAACTAAATACCGAGATGTCCCATGGTCAACGTTTCCACCCGTGCATAGGTCGGATGGGCGTGCT  
TCGATGGAAAGCACGGATCCGCCTAGGTTGCCCGACGGTTAAACAAGATGACGGTGTCTCCCATGGGCA  
TCGGTCAAATCTTTTGGCTAGTTTTTCGCGCTTGTGCGGCTTTGGCTTGGATTCTGTCGGTCTTCTCTCAGCT  
CAACCAAATACTTTGGAAGAGCTGTGGGAACGATTGAAGTTTTTGGGTCAACTGAACGTTCCGGCGTAGAG  
TGGTGATCGG

>Cp

CTTTTCCGGGCACTTTTCCGGCGAGCGTTTTGATGACTTTCTCTGATTTTTTCAGCATGTCTCCACGAAAG  
ATGGTGATATAGCGGCCTAGTCTGATAGCGAGCTTGTAGATTCCAAAGGTGCATGTCCGAGTGAAATGATG  
GAGCTGGCCCGGGAGTGGGGTAGAGGAGCCTTAACGGGTAAACCACTACTTTTCGTCCCCCGCGGCGAA  
GTTGTTTCCGTGACATGCATTGGAGGAAATTGTTTGAATCGATTTGGGCTAGTGTTTCGCGCTTGTGCGG  
CTTTGGCTTGGATTGCGCTGTCTTCTCTCGCTCTTTTGATTTCCTCGGAAGGGTTGTGCGAAAGATTGTCTG  
CTTCGGGTCAACTGAACGTTCCGGCGTATGAGTGGTGATCGG

>Dm

CTTTTCCGGGCACTTTTCCGGCGGACGGTTTTAGAGGATTTTTGGGTTTTTCGACCGTGCTGATGGGTTTTG  
AAAATGAAAGCTACGGAATTCCACGACTGTAAGTCGACATAGTAGCCGTTTGGGTCCGTCTAAGCTTGGAG  
GCAAATAATTGGTCGTTTCGATTAGCCGTAAAGATTGGTGCGGATCGTTTCTGGGTGTCGTAGTGACAGCC  
TCTGGCGTAGGGCCAATGTGAACCTAACTGACATTATGTTAATATTGTTACAGCCCAGCTACGCGATCAC  
TAATACCCCCAGAGTTTCGAGCCGTGGCGCCTGCTTTCGGTGAAAACCGATGTGCGTTTGCTTTCAGGTTT  
CCATGTCCTAGCAGTAGGTATTATGATATCGGATAAAGGATGGCCCTGTTCCGCAGGCGCAATTGTTCCGAT  
TCGATATCATAACCGAAAATGGGAACCTGGGTACGATGGTCCTATATTGGTGAACCGTTTGCTTACTTTTGGC  
GGCGTCAATAGTTGAGTTTTCTTCCCGAAGGCTTATATTCCCTTCCCACGGCCCCCTATTTGTGTGCCCTT  
GGTGTTTTTCGCGCTTGTGCGGCTTTGGCTTGGTTATGTCCGTCTTCTCTCTGCTCATCCAAATCCTTGGACG  
AGTGGTGGAATGATTGATGTTTTCGGGTCAATTGAACGTTCCGGCGTATGAGTGGTGATCGG

>Lc1

CTTTTCCGGGCACTTTTCCGGCGGCGGTTTTAAGCGATTTTTGGCTCTTCTGGGGGGGATTATGACGAAA  
GATGGTGTTTCCGTTGAGCTTGTGGTTGGCCTAGAGGAATGGGCGTGCTAGCGTGGAAGCATGGATTCT  
TCTAGGCTCCAACGGGTGGCGTTTTTTCAGATCGAGGTGTCCCCATGGCATCGAACCACCCTTTCGCCAG  
GCGGCTGGGCGTGCTTCGTTGGAAGTACGGATCCGTCTGGGCTGTCCCGATCGGAAAAGCAGGGGC  
GTTTCGCCCATGGAAATCGTTCACCCTGCGTCGGGAACCTGATGCGGAACCTGGGCTCTAGGCGGCGATTTA  
AAGTGGCATATGAAAGCGGGTTCGAGAAAAATCTGATCTCTTCGGTAGTTAGCTCACACTGTCCGGGTGAA  
CCAACAAAACGAGATTCGATTTCGATTGTCCCCGAACGATTTTGCTCAACTTAAAATCGTCGTTGATATCCCT  
CTCCGCAGATGTTCTTGGAACCATCCCGCGATGGAAGTCCGGCCATTTGAAGGGTCGGCCGTAGGTGCT  
GATGGGCGACGGTGCCGAAGGAAATTTGCCAACGGGTTCCGAAGCGATCACTCTGTCCGAAGTCTCTTT  
GGTTTGGCGAAGAATATCCAATTATTGCGGTGAGCCATTTGCATAATCCTGACCACAGTGGACGCTAGTA  
ACCTTTTGATGTCGAAAATGGATGGCACTGGCATGCGTAACGCGATAAGCTTTCTTAGAGATTACGTCCCC  
AGGTGCAGTTGTTCCCTCTTAATGATGTCATCGGGCGAAGGCCGAAATGTGCGACGGTTTGTGGGTTTGG  
TGAGATCTCAGTTTTGGTGTTTCCATAGGCAGATCATCGAGAACAGTAAGATCTTTGTGACCGTAGACGTTT  
TCCAAAGGCGATGACCGAAGTATCAGCCTGATGATGTAGCTACGTTACTGCCCGGGCGGATGGGCGTGCT  
TTTATTAATTTATGTGGTGGGAAAGCACGGATCCGCCTAGGCTGTGTCCCGACGGGTTAAAGAAGGTGGT  
GGTGTCATCCCATCGGCATCGTTCCATCTTTTTCGTGCTTGTGCGGCTTTCCGGCTTGGTTACGTCCGTCTTC  
CCGTGCTCAACCGAGTTCAACCTCGGAAGGGTTGCGAGAAAGATTGATGTTTTCCGGTCAACTGAACGT  
TCGGCGTATGAGTGGTGATCGG

>Lc2

CTTTTCCGGGCACTTTTCCGGCGACTTTCCGGCGAGTTTCCGGTGGTTCATTTTCTTCCCTTTATTTTTTCG  
CGCTTGTGCGGCTTTGGACTGGTTTCATTTGTCTTCCTATTGCATTTTCGATTATATCGAAAGAGTGGTTGG  
AAAGATTGATGTTAGCGGGCCAACGAACGTTCCGGCGTATGAGTGGTGATCGG
