# Supplementary material for: 45S rDNA Diversity In Natura as One Step towards Ribosomal Heterogeneity in Arabidopsis thaliana
Source: MDPI journal article supplement (doi:10.3390/plants12142722), 2023-07-21
Supplement: s1 [file s1]

**Figure S8:** Fasta sequence of the 45S rDNA of 10524 bp used as a reference to estimate 18S and 25S copy number variation and rDNA variants. This reference includes the most abundant 5' and 3'ETS variants identified in the reference Col-0 and At66, VARA (150-1409) and VAR1 (7852-8322). Annotation of 18S, ITS1, 5.8S, ITS2 and 25S coordinates respectively 1841-3644, 3645-3912, 3913-4073, 4074-4263, 4264-7639.

>45S rDNA unit

```
TATATAGGGGGGTGGGTGTTGAGGGAGTCTGGGCAGTCCGTGGGGAACCCCCTTTTT
CGGTTTCGGA CT TGGGTAGCGATCGAGGGATGGTATCGGATATCGGCACGAGGAATGA
CCGACCGTCCGGCCCGGGGATTTTCGCCGGA AAACTTTTCCGGGCACTTTTCCGGC
GATCGGTTTTGTTGCCTTTTTCCGAGTTTTCTCAGCAGTTCTCGGACAAAACTGCTG
AATCGTCGAGGAGAATGGGCTTGCTTGCGTGGGCTGCCATTAGTTCTTCGAGGCGTT
AGGGTGGCGGCGGTATAAAAGTGTGCGAGTTTTTTCAGCAGTTCTCGGACAAAATTG
CTGAGTGGCCGAGAAGAATGGGCGTGT CATGCGTGGGCTGACATGGATTCTTCGAGG
CCTAGGGGTGGCGGTATATAACTTGTTGCGATGATATTACCGAGATGTCCCCACGGGC
ATCTTTTACCTCGTCGCCGAAGAGAATGGGCGTGT CATGGCATGGGCTGACATGGAT
TCTCCTAGGCCGTTTGGGTGGCGGTATAGTCGTCTTGCGCACGAAATACCGAGATGTC
CCCATGGGCATCGATTCCACCCGCCTAGGTTGGATGGGCGTGCTTCGTGCGAAAGCA
TGGATCCGCCTAGGCTGTCCCGAGTGTGAGCGAGGTGTGAGTGTGCGCCCATGGGCA
TCGACACCTTGCGGCTAGGAACTGGAACGAGACGGGTGGCAAAGATTTTCGAGTAGCA
CTTCATACTACCGTGGGTTTTTTAAACCTTCCGAGTTTTGTTGATGTTATTCCGAGAATT
AGCAAACCGTAACGAAGATGTTCTTGCAACCATCTTTTGATGGGAGTCCGGCTGTTT
GATAGCCGGCCAAGGGTGATGAACGAAATGTGAACCCTTGCTCGCCTAGGTTGGAT
GGGCGTGCTTCGTTGGAAAGCATGGATCCGCCTAGGCTGTCCCGAGTGTGAGCGAG
GTGTGAGTGTGCGCCCATGGGCATCGACACCTTGCGGCTAGGAACTGGAACGAGACG
GGTAGCAAAGATTTTCGAGTAGCACTTCATACTACCGTGGGTTTTTTAAACCTTCCTAGT
TTTGTTGATGTTATTCCGAGAATTAGCAAACCGTAACGAAGATGTTCTTGGAACCATC
TTTTGATGGGAGTCCGGCTGTTTGAAAGCCGGCCAAGGGTGATGAACGAAATGTGAA
CCCTTGCTCGCCTAGGTTGGATGGGCGTGCTTCGTTGGAAAGCATGGATCCGCCTA
GGCTGTCCCGAAGTATCTCGCGCTTGACGGCTTTGGCTCGGATTCGTCCGTCTTCTT
TCTTCTTAGCCGAGTACTTCGGTAGATTAGTTGGAACGATTGATGATTTTGAGTTAATTG
AACGTTCCGGCGTATGAGTGGTGATCGGATAGCTAGTGTTTCGTAGGCTCCATGCTCGCG
CATCGAACTACCTACCACCTATCCTTCTCAGTTAATTACGGGCGATGTTACGCTCGAT
GATGAGTTCCGGGGCCTGTGTTTCGTACCTAATTTGAAGGAATTGTTGAGTTTGGTTTA
CACCTTTGCCCGCGGCTTCTCCTTCGTGGGGAAGTCGTGGGCTCAAACATCGGCGCT
TGTTACCTCTCGTCATCGCATTGTTGCCTTGCTCGCATTGGTGAATGAGTTGCGGG
TTGAAATCTCGGATGCGGAAAAGTTGTGACGGTGACTCGAAGTGATTAGTCCCGC
CAAAGCTCATCCGTCCTTCGGGCAAAGATGACGGTCAAGACCTCGTCCTTTCTCTCT
TTCCATTGCGTTTGAGAGGATGTGGCGGGGAATTGCCGTGATCGATGAATGCTACCTG
GTTGATCCTGCCAGTAGTCATATGCTTGCTCAAAGATTAAGCCATGCATGTGTAAGTAT
GAACGAATTCAGACTGTGAAACTGCGAATGGCTCATTAAATCAGTTATAGTTTGTTTGAT
GGTAATACTACTCGGATAACCGTAGTAATTCTAGAGCTAATACTGCAACAAACCCCG
ACTTATGGAAGGGACGCATTTATTAGATAAAAGGTGACGCGGGGCTCTGGCTTGCTCT
GATGATTCATGATAACTCGACGGATCGCATGGCCTCTGTGCTGGCGACGCATCATTCA
AATTTCTGCCCTATCAACTTTCGATGGTAGGATAGTGGCCTACCATGGTGGTAACGGGT
GACGGAGAATTAGGGTTCGATTCCGGAGAGGGAGCCTGAGAAACGGCTACCACATCC
AAGGAAGGCAGCAGGCGCGCAAATTACCCAATCCTGACACGGGGAGGTAGTGACAAT
AAATAACAATACCGGGCTCTTTCGAGTCTGGTAATTGGAATGAGTACAATCTAAATCCCT
TAACGAGGATCCATTGGAGGGCAAGTCTGGTGCCAGCAGCCGCGGTAATTCCAGCTC
CAATAGCGTATATTTAAGTTGTTGCAGTTAAAAAGCTCGTAGTTGAACCTTGGGATGGG
TCGGCCGGTCCGCCTTTGGTGTGCATTGGTCGGCTTGTCCTTCGGTCGGCGATACG
CTCCTGGTCTTAATTGGCCGGGTCGTGCCTCCGGCGCTGTTACTTTGAAGAAATTAGA
```

GTGCTCAAAGCAAGCCTACGCTCTGGATACATTAGCATGGGATAACATCATAGGATTTC  
GATCCTATTGTGTTGGCTTCGGGATCGGAGTAATGATTAACAGGGACAGTCGGGGGCA  
TTCGTATTTTCATAGTCAGAGGTGAAATTCTTGATTATGAAAGACGAACAACTGCGAA  
AGCATTTGCCAAGGATGTTTTTATTAATCAAGAACGAAAGTTGGGGGCTCGAAGACGA  
TCAGATACCGTCCTAGTCTCAACCATAAACGATGCCGACCAGGGATCAGCGGATGTTG  
CTTATAGGACTCCGCTGGCACCTTATGAGAAATCAAAGTTTTTGGGTTCGGGGGGGAG  
TATGGTCGCAAGGCTGAAACTTAAAGGAATTGACGGAAGGGCACCACCAGGAGTGGA  
GCCTGCGGCTTAATTTGACTCAACACGGGGGAACTTACCAGGTCCAGACATAGTAAGG  
ATTGACAGACTGAGAGCTCTTTCTTGATTCTATGGGTGGTGGTGCATGGCCGTTCTTA  
GTTGGTGGAGCGATTTGTCTGGTTAATTCCGTAAACGAACGAGACCTCAGCCTGCTAA  
CTAGCTACGTGGAGGCATCCCTTCACGGCCGGCTTCTTAGAGGGACTATGGCCGTTTA  
GGCCAAGGAAGTTTGAGGCAATAACAGGTCTGTGATGCCCTTAGATGTTCTGGGCCG  
CACGCGCGCTACACTGATGTATTCAACGAGTTCACACCTTGCCGACAGGCCCGGGTA  
ATCTTTGAAATTCATCGTGATGGGGATAGATCATTGCAATTGTTGGTCTTCAACGAGG  
AATTCCTAGTAAGCGCGAGTCATCAGCTCGCGTTGACTACGTCCCTGCCCTTTGTACA  
CACCGCCCGTCGCTCCTACCGATTGAATGATCCGGTGAAGTGTTCCGATCGCGGCGA  
CGTGGGTGGTTCGCCGCCCGCGACGTCGCGAGAAGTCCACTAAACCTTATCATTTAG  
AGGAAGGAGAAGTCGTAACAAGGTTTCCGTAGGTGAACCTGCGGAAGGATCATTGTC  
GATACCTGTCCAAAACAGAACGACCCGCGAACCAAGATCACCCTCTCGGTGGGCC  
GGTTTCTTAGCCGATTCTTGCCCGCCGGATCCGTGGTTTTCGCGTATCGGCATGATCG  
GGAGCTTTTATCTCGGTCTTGTCGTGCGCGTTGCTTCCGGATATCACAAAACCCCGGC  
ACGAAAAGTGTC AAGGAACATGCAAACGAACGGCTGGCATTGCGCTCCCCGGAGACG  
GAGTGTGGGCGGATGCTGTGCTGCGAACTGAAGTCTAAAACGACTCTCGGCAACGGA  
TATCTCGGCTCTCGCATCGATGAAGAACGTAGCGAAATGCGATACTTGGTGTGAATTG  
CAGAATCCCGTGAACCATCGAGTCTTTGAACGCAAGTTGCGCCCCAAGCCTTCTGGC  
CGAGGGCACGTCTGCCTGGGTGTACAAATCGTCGTCCCTCACCATCCTTTGCTGAT  
GCGGGACGGAAGCTGGTCTCCCGTGTGTTACCGCACGCGTTGGCCTAAATCCGAGC  
CAAGGACGCCTGGAGCGTACCGACATGCGGTGGTGAACCTTGATCCATTACATTTTATC  
GGTCGCTCTTGTCGGGAAGCTGTAGATGACCCAAAGTCCATATAGCGACCCAGGTC  
AGGCGGGATTACCCGCTGAGTTTAAGCATATCAATAAGCGGAGGAAAAGAACTAACA  
AGGATTCCCTTAGTAACGGCGAGCGAACCGGGAAGAGCCAGCTTGAAAATCGGACG  
TCTTCGGCGTTTGAATTGTAGTCTGGAGAAGCGTCCTCAGCGACGGACCGGGCCTAA  
GTTCCCTGGAAGGGGGCGCCAGAGAGGGTGAGAGCCCGTCGTGCCCGGACCCTGT  
CGCACACGAGGCGCTGTCTACGAGTCGGGTTGTTTGGGAATGCAGCCCCAATCGG  
GCGGTAAATTCCGTCCAAGGCTAAATACGGGCGAGAGACCGATAGCGAACAAAGTACC  
GCGAGGTAAAGATGAAAAGGACTTTGAAAAGAGAGTCAAAGAGTGCTTGAAATTGTGCG  
GGAGGGAAGCGGATGGGGGCCGCGATGCGTCCTGGTCCGATGCGGAACGGAGCA  
ATCCGGTCCGCCGATCGATTGCGGGCGTGGACCGACGCGGATTACGGTGGCGGCCCT  
AAGCCCGGGCTTTTGATACGCTTGTGGAGACGTCGCTGCCGTGATCGTGGTCTGCAG  
CACGCGCCTAACGGCGTGCTCGGCATCAGCGTGCTCCGGGCGTCGGCCTGTGGG  
CTCCCCATTGACCCGTCTTGAAACACGGACCAAGGAGTCTGACATGTGTGCGAGTC  
AACGGGTGAGTAAACCCGTAAGGCGCAAGGAAGCTGATTGGCGGGATCCTCGCGGG  
TGCACCGCCGACCGACCTTGATCTTCTGAGAAGGGTTCGAGTGTGAGCATGCCTGTC  
GGGACCCGAAAGATGGTGAACATGCCTGAGCGGGGTAAAGCCAGAGGAACTCTG  
GTGGAAGCCCGCAGCGATACTGACGTGCAAATCGTTCGTCTGACTTGGGTATAGGGG  
CGAAAGACTAATCGAACCATCTAGTAGCTGGTTCCTCCGAAGTTTCCCTCAGGATAG  
CTGGAGCTCGGACGCGAGTTCTATCGGGTAAAGCCAATGATTAGAGGCATTGGGGGC  
GCAACGCCTCGACCTATTCTCAAACCTTTAAATAGGTAGGACGTGTCGGCTGCTTTGTT  
GAGCCGTCACACGGAATCGAGAGCTCCAAGTGGGCCATTTTTGGTAAGCAGAACTGG  
CGATGCGGGATGAACCGGAAGCCGGGTACGGTGCCCAACTGCGCGCTAACCTAGA  
ACCCACAAAGGGTGTTGGTCGATTAAGACAGCAGGACGGTGGTCATGGAAGTCGAAA  
TCCGCTAAGGAGTGTGTAACAACCTCACCTGCCGAATCAACTAGCCCCGAAAATGGATG

GCGCTTAAGCGCGACCTATACCCGGCCGTCGGGGCAAGAGCCAGGCCTCGATGAGT  
AGGAGGGCGCGGCGGTTCGCTGCAAAACCTAGGGCGCGAGGCGCGGAGCGGCCGTC  
GGTGCAGATCTTGGTGGTAGTAGCAAATATTCAAATGAGAACTTTGAAGGCCGAAGAG  
GGGAAAGGTTCCATGTGAACGGCACTTGCACATGGGTAGTCGATCCTAAGAGTCGG  
GGGAAACCCGTCTGATAGCGCTTAAGCGAACTTCGAAAGGGGATCCGGTTAAATTC  
GGAACCGGGACGTGGCGGTTGACGGCAACGTTAGGGAGTCCGGAGACGTTCGGCGG  
GGGCCTCGGGAAGAGTTATCTTTCTGTTTAAACAGCCTGCCCACCCTGGAAACGGCT  
CAGCCGGAGGTAGGGTCCAGCGGCTGGAAGAGCACCGCACGTTCGCGTGGTGTCCG  
GTGCGCCCCCGGGCGCCCTTGAAAATCCGGAGGACCGAGTGCCGCTCACGCCCGG  
TCGTAATCATAACCGCATCAGGTCTCCAAGGTGAACAGCCTCTGGTCGATGGAACAAT  
GTAGGCAAGGGAAGTCGGCAAAATGGATCCGTAACCTCGGGAAAAGGATTGGCTCTG  
AGGGCTGGGCTCGGGGGTCCAGTTCCGAACCCGTCGGCTGTCAGCGGACTGCTC  
GAGCTGCTTCCGCGGCGAGAGCGGGTTCGCCGGCTGCCGGCCGGGGGACGACTGG  
GAACGGCTCTCTCGGGAGCTTTCCCCGGGCGTCGAACAGTCAGCTCAGAACTGGTA  
CGGACAAGGGGAATCCGACTGTTTAATTAAACAAAGCATTGCGATGGTCCCTGCGGA  
TGCTAACGCAATGTGATTTCTGCCAGTGCTCTGAATGTCAAAGTGAAGAAATTCAACC  
AAGCGCGGGTAAACGGCGGGGAGTAACTATGACTCTCTTAAGGTAGCCAAATGCCTCGT  
CATCTAATTAGTGACGCGCATGAATGGATTAACGAGATTCCCACTGTCCCTGTCTACTA  
TCCAGCGAAACCACAGCCAAGGGAACGGGCTTGGCAGAATCAGCGGGGAAAGAAGA  
CCCTGTTGAGCTTGACTCTAGTCCGACTTTGTGAAATGACTTGAGAGGTGTAGGATAA  
GTGGGAGCTTCGGCGCAAGTGAAATACCACTACTTTTAACGTTATTTTACTTACTCCGT  
GAATCGGAGGCCGGGGTACAACCCCTGTTTTTGGTCCCAAGGCTCGCTTCGGCGGG  
TCGATCCGGGCGGAGGACATTGTCAGGTGGGGAGTTTGGCTGGGGCGGCACATCTG  
TTAAAAGATAACGCAGGTGTCCTAAGATGAGCTCAACGAGAACAGAAATCTCGTGTGG  
AACAAAAGGGTAAAAGCTCGTTTGATTCTGATTTTCAGTACGAATACGAACCGTGAAAG  
CGTGGCCTATCGATCCTTTAGACTTCGGAATTTGAAGCTAGAGGTGTCAGAAAAGTTAC  
CACAGGGATAACTGGCTTGTTGGCAGCCAAGCGTTCATAGCGACGTTGCTTTTTGATCC  
TTCGATGTCGGCTCTTCCTATCATTGTGAAGCAGAATTCACCAAGTGTTGGATTGTTCA  
CCCACCAATAGGGAACGTGAGCTGGGTTTAGACCGTCGTGAGACAGGTTAGTTTTACC  
CTACTGATGCCCGCGTCGCGATAGTAATTCAACCTAGTACGAGAGGAACCGTTGATTC  
GCACAATTGGTCATCGCGCTTGGTTGAAAAGCCAGTGGCGCGAAGCTACCGTGCGCT  
GGATTATGACTGAACGCCTCTAAGTCAGAATCCGGGCTAGAAGCGACGCATGCGCCC  
GCCGCCCGATTGCCGACCCTCAGTAGGAGCTTAGGCTCCAAAGGCACGTGTCGTTG  
GCTAAGTCCGTTTCGGCGGAACGGTCGTTTCGGACCGCCTTGAATTATAATTACCACCGA  
GCGGCGGGTAGAATCCTTTGCAGACGACTTAAATACGCGACGGGGTATTGTAAGTGG  
CAGAGTGGCCTTGCTGCCACGATCCACTGAGATTACGCCCTTTGTGCTAAGATTCTGA  
CCCTCCCCTAAATCACTCCAAAAAAAACAATCCCCAATTCTACACAAGTGTCTTCTACAC  
TAACAAAGCAACAGCTCCTTAACGAATTCCTCACTTTACACGAGCTCGTCTCTCGAGG  
TTAAATGTTATTACTTGGTAAGATTCCGGACCTCGCCAAGTGTTTTGAAAACCCGCAAC  
GCTCGCAAAGGTGGATAGTGAGAATAATAAGTGAAGAGACAGACTTGTCCTAAAACGCC  
CACCACGAAGGTGCATAGTGAGAAGAGTAAGTCAAGAGATAGACTTGTCCTAAAAGAA  
ACGGAAGAGAAAGCGTGGGGAGACGCTCACGAAGGTGCATAGTGAGAAGAGTAAGT  
CAAGAGACAGACTTGTTTCGAAAAGAAACAGAAGAGAATGCTTGGGGTTACACTCACG  
AAGGTGCATAGTGAGAAGAGTAAGTCAAGAGACAGACTTGTTTCGAAAAGAAACAAAAG  
AGAATGCTTGGGGAGATAGAAGTGTGAGATAGTTCTCAAGCTAAGAAAGTTGTAAAAG  
CTAAGAACTAGCATCAAATGATGGATGAAACACAAGGTAGTTGTTGAAAAGTCAAACAC  
TTGGTGATATGAACACAAACGTTCAATATGACAAACCCATGCCAAGTAAAGAGAAAATG  
AAAACCTGGTGATTGTTGCGGAAATCGTCCAGGATTCTCGACCAAGGACTTGAAATCGT  
CGAGGGGAAAAAATCGGTTCCGAGGAATCGTCGATCCGGACTTGGAATCGTCGAGAA  
AAGTTTACCGGGTCCGAGGATTTGTGACCAAGGAGTGGAATCGTCGAGAAAAATCTA  
TCGGGTCCGAGGAATCGTCGACCAAGGACGAGGAATCGTCGACCGGGTCCGAGGATT  
TGTCGACCAAGGGGTTGAAATCGTCGACCAAGTCCGAGACTTCATCGACCGGGTCCGA

GGATTCGTCGACCAGGAGTGGAATCGTCGAGAAAAATCTATCGGGTCCGAGGAATC  
GTCGACCAGGACGAGGAATCGTCGACCGGGTCCGAGGATTTGTCGACCAGGTCCGA  
GACTTCATCGACCGGGTCCGAGGATTCGTCGACCAGGTCCGAGACTTCATCGACCGG  
GTCCAAGTATTTGATTTTATTTTGAACCGGTGTCTCCTCAGACATTTCAATGTATGTTG  
GTGCCAAGAGGGGAAAAGGGCTATAAAGCTATATAGGGGTGGGTGTGTGTAGTGGGAAT  
TTTGCCCGCACGCGCGCGCGCAATAAGAATAAGAATAAGTAATAAGAATAAGAATAAG  
AAAAAGAAAAAAAAAAAAAAAAAAAAAAAAACAAAACTCCATAGAGTTGTTTTCTCAATC  
GGGTCCGAGGAATCGTCGATCTGGAATCGTCGAGAAAAGTTTACCGGGTCC  
GAAAATTTGTCGACCAGGAGTGGAATCGTCGAGAAAAATCTATCGGGTCCGAGGAAT  
CGTCGACCAGGACGAGGAATCGTCGACCGGGTCCGAGGATTTGTCGACCAGGGGT  
GAAATAGTCGACCAGGTCCGAGACTTCATCGACCGGGTCCGAGGAATCGTCGACCAG  
GAGTGGAATCGTCGAGAAAAATCTATCGGGTCCGAGGAATCGTCGACCAGGACGAG  
GAATCGTCGACCGGGTCCGAGGATTTGTCGACCAGGTCCGAGACTTCATCGACCGG  
GTCCGAGGATTCGTCGACCAGGTCCGAGACTTCATCGACCGGGTCCAAGTATTTGATT  
TTATTTTGAACCGGTGTCTCCTCAGACATTTCAATGTATGTTGGTGCCAAGAGGGAAA  
AGGGCTATAAAGCTATATAGGGGTGGGTGTGTGTAGTGGGAATTTTGCCCGCACGCGC  
GCGCGCGATAAGAATAAGAATAAGTAATAAGAATAAGAATAAGAAAAAGAAAAAAAAAA  
AAAAAAAAACAAAAACAAAACTCCATAGAGTTGTTTTCTCAATCGGGTCCGAGGAATCG  
TCGATCTGGAATCGTCGAGAAAAGTTTACCGGGTCCGAAAATTTGTCGACCA  
GGAGTGGAATCGTCGAGAAAAATCTATCGGGTCCGAGGAATCGTCGACCAGGACGA  
GGAATCGTCGACCGGGTCCGAGGATTTGTCGACCAGGGGTGAAATCGTCGACCAG  
GTCCGAGACTTCATCGACCGGGTCCGAGGAATCGTCGACCAGGACGATGAATGGTCG  
ATGAAAATCTATCGGGTTCGAGGAATGGTCGACCAGGGGTGAAATCGTCGACCAGG  
TCCGAGACTTCATCGACCGGTGTCCGAGGAGTGGTCGAGGGTTTGTGACCAGGACG  
AGGAATCGTCGACCGGGTCCGAGGATTTGTCGACCAGGGGTGAAATCGTCGACCAG  
GACCGAGAATTCGTCGACCAGGACGGCGGAACCCTCGACCAGGACGATGAATGGGC  
GATGAAAATCTATCGGGTTCGAGGAATGGTCGACCAGGGGTGAAATCGTCGACCAG  
GTCCGAGACTTCATCGACCGGGTCCGAGGATTCGTCGACCAGGACGGCCGGATGTC  
CGAGAAAAAAAAATGTTGCCGAATAACTTTGAAAATCATTGGATATGATGCAATGTTTT  
GTGATCGAATCTCTTAAATACATCAATAAAGAGTTTAGGATGTCAAGTTTGCATCAAAT  
ATGCCACGGAGCCCCAACTAGACCATGAAAATCCGATGTTGTATCAGGTCAAATGAC  
CTAGCTAGAGGTGTCAAAAAATTATGAAAATTTACCAGAAAATAGGATTTAGTATCCTTAT  
GATGCATGCCAAAAAGAATTTTCAAATCCAAGTATTTCTTTTTCTTGGCACCGGTGTC  
TCCTCAGACATTTCAATGTCTGTTGGTGCCAAGAGGGGAAAAGGGCTATTAAGC
