# Supplementary material for: 45S rDNA Diversity In Natura as One Step towards Ribosomal Heterogeneity in Arabidopsis thaliana
Source: Plants (Basel). 2023 Jul 21;12(14):2722. doi: 10.3390/plants12142722 (PMC10386311; doi:10.3390/plants12142722)
Supplement: Supplementary file 1 [file plants-12-02722-s001.zip › Table_S1.csv]

individual	18S_coverage	25S_coverage	chr3_coverage	18S_CNV	25S_CNV
PO01A	11198.6640625	11810.7607422	18.1740665	616.189231094758	649.86890755572
PO01B	8824.1621094	9207.5791016	18.4408493	478.511697907536	499.30341882898
PO01C	7110.5239258	7386.5966797	14.8501244	478.819148868544	497.409750971514
PO02A	7951.7158203	8445.5751953	17.1187210	464.504084171942	493.353165537309
PO02B	12528.6787109	13115.3115234	16.6069984	754.421624494165	789.746058107647
PO02C	13376.3701172	14155.1562500	19.4736595	686.895553308817	726.887324388105
PO02D	12422.7675781	12985.9677734	16.8505268	737.233187160653	770.656486146178
PO02E	13660.9541016	14214.0283203	21.3691006	639.285403598128	665.167364147277
PO02F	13909.1894531	14999.5576172	21.5009632	646.910062759421	697.62258916847
PO02G	11073.7216797	11655.2773438	16.9804382	652.145813274713	686.394379610298
PO02H	9247.9150391	9703.0283203	15.5947523	593.014551382134	622.198296814243
PO02I	8178.7114258	8587.5791016	18.4190559	444.035322451027	466.23340241885
PO02J	7168.8710938	7372.2822266	17.5067043	409.492898889027	421.111940903691
PO03A	11730.4560547	11946.8232422	19.0551186	615.606562254617	626.961368910084
PO03B	9717.8232422	10054.2929688	15.9139566	610.647841166037	631.790900372318
PO03C	13331.7578125	13940.4980469	21.3256702	625.150707455844	653.695659557747
PO03D	14466.0976562	15066.7460938	18.4780235	782.881224076807	815.387321798784
PO03E	14293.1865234	15143.7070312	18.8190060	759.508048586626	804.702811147411
PO03F	10999.5205078	11664.6425781	20.6531620	532.582880422862	564.787250402626
PO03G	10416.4902344	10915.0791016	19.3692703	537.784339475091	563.525570790346
PO03H	14856.2353516	16054.8427734	16.7592831	886.448141185705	957.967156327826
PO03I	12719.5009766	13499.0664062	17.2941017	735.482027181556	780.558981343333
PO04A	16168.3066406	17004.3046875	20.8141632	776.793498025422	816.958362635496
PO04B	13571.8515625	14226.8798828	17.7721367	763.658967494888	800.516005641573
PO04C	14113.3212891	14910.5927734	17.9127407	787.892904021103	832.401530459267
PO04D	10056.2197266	10530.0419922	16.6964264	602.297730405352	630.676393853957
PO04E	15625.6347656	16406.4882812	20.1370621	775.963975678458	814.7409090624
PO04F	4566.4145508	4868.9438477	13.6008320	335.745236085557	357.988676553023
PO04G	13111.9902344	13650.0791016	16.6479988	787.601584546006	819.923119023771
PO04H	12622.4423828	13455.9570312	16.3085842	773.975363404017	825.084315485829
PO05G	10184.5878906	10817.9648438	18.1165962	562.168951505361	597.130096866651
PO06A	9141.9277344	9528.1123047	16.5140228	553.585752249295	576.971003376597
PO06B	12736.8564453	13426.0429688	19.6206989	649.154064807549	684.279547697457
PO06C	8349.2294922	8831.9111328	16.3878250	509.477584255385	538.931257369419
PO06D	10958.1699219	11692.5507812	20.2365723	541.503262481858	577.793047550844
PO06E	11088.8427734	11645.7988281	16.0361271	691.491324822438	726.222656847114
PO06F	11390.3232422	12004.1123047	16.6272392	685.039957938417	721.954628805725
PO07G	9079.3359375	9549.9423828	13.5861406	668.279256398981	702.917970891601
PO07H	6907.5888672	7174.7734375	14.5648623	474.263932258392	492.608394759764
PO08A	10461.9277344	10766.4257812	16.1760807	646.752939010746	665.57690832984
PO08B	17546.7636719	18020.2402344	18.7262001	937.016777466775	962.300954714246
PO08C	19599.0253906	20365.0058594	18.9543209	1034.01358951351	1074.42550787457
PO08D	15458.2509766	15731.8349609	19.7691135	781.939512694892	795.778473369582
PO08E	14231.4179688	14853.5859375	17.2821846	823.473322278944	859.473861741993
PO08F	13231.7714844	13656.2753906	17.2954369	765.044072659419	789.588344576598
PO08H	10474.7021484	10784.4267578	17.4986496	598.600599922865	616.300514858015
PO08I	15498.5693359	15985.7822266	18.5407753	835.918082449335	862.195996011019
PO08J	13048.6132812	13701.9853516	18.6892357	698.188705555252	733.148512413485
PO08K	14894.2929688	15587.2968750	16.1666775	921.295854933705	964.162047210999
PO09K	9276.3769531	9752.3115234	17.2427597	537.986790658574	565.588785848474
PO10A	14552.3906250	15335.4853516	17.8063908	817.256612440518	861.234908513858
PO10B	8204.7841797	8539.6699219	15.2346020	538.562423862468	560.54433991121
PO10C	12197.1728516	13134.1914062	17.3009033	705.002082266999	759.162176589935
PO10D	8649.0888672	9111.9384766	15.8697844	545.003551982723	574.169014961539
PO10E	8660.5722656	9107.2666016	18.9795017	456.311888609805	479.84750840956
PO10F	9453.7705078	9706.8203125	18.1623363	520.515111692982	534.447779854181
PO10G	15886.2724609	16544.2636719	19.8229752	801.407069353545	834.600432325618
PO10H	6497.1889648	6632.9052734	20.2839069	320.312501769568	327.003338464347
PO10I	11111.9931641	11882.2753906	14.4153852	770.842610858571	824.277341586405
PO10J	10282.9306641	10780.0869141	15.3879099	668.24739233104	700.555629981951
PO11A	7813.0600586	8341.2851562	16.9334888	461.396948430379	492.591057561629
PO11B	7924.7636719	8587.4189453	17.8502331	443.958553790538	481.081613735341
PO11C	8107.7387695	8405.9755859	19.0915279	424.677312992849	440.298735121142
PO11D	9103.2578125	9556.1289062	16.5183544	551.099558228391	578.515793691895
PO11E	8654.8818359	9238.5986328	19.6797199	439.786840457013	469.447668957931
PO11F	8634.7597656	8987.6201172	19.3746414	445.673268853379	463.885753116442
PO11G	9391.9931641	9688.8037109	20.2771568	463.180970425795	477.818651128643
PO11H	7804.5307617	8208.7451172	17.7658272	439.300161700323	462.052513783315
PO11I	9094.5263672	9822.8173828	14.7212019	617.784229098848	667.256481469764
PO11J	8971.1074219	9623.4296875	14.9160957	601.438043998337	645.17081956641
PO12A	6895.0776367	7383.8647461	14.1617279	486.881098506348	521.395750450762
PO12B	7013.9350586	7375.0751953	14.5538673	481.929298517103	506.743331052634
PO12C	7809.3598633	8219.6269531	16.2320271	481.108108998906	506.383269474704
PO12D	9055.1054688	9523.2812500	18.9320984	478.293809670882	503.023016719584
PO12E	7603.9311523	8112.6157227	16.4850903	461.261116191763	492.118367267906
PO12F	8791.5410156	9239.3964844	17.2666054	509.164413730101	535.102081176883
PO12G	8001.7412109	8632.4111328	16.0288944	499.207307205168	538.553122715688
PO12H	7389.9580078	7889.5117188	15.6500912	472.199037907204	504.119216813254
PO12I	8777.6191406	9423.8535156	18.3831291	477.482320493523	512.635986198889
PO12J	7315.2485352	8006.9204102	15.9338589	459.100873247974	502.509810112602
PO12K	7072.5312500	7689.4648438	16.3835354	431.685291197894	469.340997291708
PO12L	7745.7675781	8465.8740234	17.4012814	445.126275476472	486.508655816577
PO12M	8376.4658203	8768.6210938	18.8409023	444.589419706295	465.403458612489
PO12N	8250.3779297	8628.6933594	18.8431072	437.845937091522	457.923062678325
PO12O	12227.3164062	13247.9931641	14.5287199	841.596265215355	911.848618136
PO12P	8521.2724609	9190.5751953	17.3609161	490.830807073597	529.383077618813
PO12Q	7011.9379883	7491.3344727	15.7584305	444.964236019571	475.385824286245
PO12R	7063.3496094	7717.8774414	15.0680771	468.762507818599	512.200554203429
PO12S	7668.3330078	8359.2119141	16.8631229	454.739792461573	495.709600390803
PO12T	8618.6757812	9467.1015625	17.6360779	488.695719653177	536.803115532848
PO13A	9323.6210938	9672.7265625	16.4579124	566.512985802501	587.724999830477
PO13B	10441.6396484	11197.1728516	17.7081070	589.653069546056	632.319019283089
PO13C	10170.5205078	10396.8085938	17.1942329	591.507662304609	604.668359110106
PO13D	9977.7773438	10451.9707031	15.7503872	633.494098722855	663.600873450273
PO13E	10801.6640625	11266.9248047	17.0034962	635.261356573244	662.624008155452
PO13F	8151.5371094	8723.6113281	14.8324108	549.576007522661	588.145207527558
PO13G	7093.2993164	7528.5761719	13.2086554	537.019030445749	569.972941522875
PO13H	9425.6865234	9911.0976562	15.7211504	599.554503555923	630.430814795843
PO14A	7285.6450195	7905.7993164	14.3680611	507.072246477293	550.234249518886
PO14C	6241.0048828	6640.2333984	16.9394360	368.430500448775	391.998493834151
PO14E	11046.3261719	11698.5029297	13.2166529	835.788475000354	885.133552209728
PO14F	12122.0898438	12808.2148438	15.0523586	805.328265551686	850.910822959001
PO14G	10658.4628906	11138.3427734	14.9204817	714.351125178485	746.513617814363
PO15A	14124.7207031	14988.9853516	15.3791647	918.432241193177	974.629353673545
PO15B	15668.8808594	16382.0917969	13.5085211	1159.92570492413	1212.72281959126
PO15C	8528.5253906	9126.6386719	14.7291470	579.023713362356	619.63117564785
PO15D	8446.3847656	8802.0546875	15.0858507	559.887866688221	583.464258167423
PO15E	7436.0229492	7784.5761719	14.6855373	506.350077446605	530.084532344622
PO15F	10652.9111328	11256.8173828	18.0632401	589.756382233994	623.189268397091
PO15G	11749.5996094	12806.8476562	18.0285206	651.722893413673	710.365977350354
PO15H	9428.0732422	10211.9707031	15.3029518	616.095075343569	667.320320717471
PO16A	9574.6250000	10338.8408203	16.8426495	568.474989638655	613.848837755604
PO16B	8698.7119141	9300.4404297	14.6772289	592.667183523996	633.664603384362
PO16C	10831.5693359	11596.9082031	18.1486511	596.825035437482	638.995600234995
PO16D	8490.5322266	8885.1835938	14.3205690	592.890703337277	620.449061332689
PO16E	9341.0156250	9920.7861328	14.8432226	629.311833199887	668.371444675363
PO16F	10360.2363281	11073.0312500	17.0641956	607.133003568009	648.904379061384
PO16G	8854.8154297	9502.6621094	15.1845503	583.146372777335	625.811230603253
PO16H	9614.4101562	10246.8955078	15.8360624	607.121259903598	647.06081909604
PO16I	9616.2314453	10245.8857422	15.6178179	615.721831748339	656.038238363632
PO16J	9636.6191406	10172.3564453	16.0381546	600.855857855367	634.25978231311
PO17A	8264.2949219	8658.1669922	13.5566893	609.610114904677	638.663821276777
PO17B	10099.1035156	10591.3212891	17.2768402	584.545750188741	613.035784697482
PO17C	9204.9980469	9661.5791016	15.4985104	593.927920124504	623.38759353286
PO17D	9270.4296875	9889.2128906	14.7994595	626.40326070692	668.214463548483
PO17E	8663.0341797	9311.2714844	13.6175442	636.167142361837	683.770241362609
PO17F	8634.2158203	9258.8632812	14.8684492	580.707221322046	622.718829425734
PO18A	13942.1455078	14740.0507812	14.4473038	965.034424471644	1020.26308751118
PO18B	10373.5703125	10755.3212891	11.6727066	888.703080440658	921.407661278833
PO18C	12110.5400391	12531.1005859	13.0180817	930.28606811555	962.591945163472
PO18D	6339.1464844	6665.0200195	15.4621820	409.977484704293	431.053005293819
PO18E	7602.4228516	7880.8925781	16.8155022	452.107987093005	468.668285036411
PO19A	11856.3212891	12665.9101562	15.8987331	745.74000422084	796.661600426515
PO19B	10500.8457031	10953.7343750	14.6679306	715.905057738683	746.781170003627
PO19C	12610.3623047	13195.1572266	18.4338913	684.085747250772	715.809647125347
PO19D	10772.0351562	11168.2978516	16.5396595	651.285182515396	675.243517050638
PO19E	12707.6962891	13185.9482422	18.9094982	672.027155596334	697.31878142594
PO19F	9281.9794922	9957.9794922	14.2889690	649.590568234839	696.899789774896
PO19G	10953.3662109	11400.0654297	17.9668922	609.64167252587	634.504025671173
PO19H	14435.4707031	15160.1396484	20.7049599	697.19867958305	732.198454941224
PO19I	14103.2460938	15031.6728516	19.6891384	716.295746785954	763.450007116614
PO19J	12154.0332031	13012.2089844	19.5021954	623.213589742825	667.217649988267
PO20A	9571.2812500	10064.6093750	17.4410629	548.778552366783	577.063991610282
PO20B	8807.9091797	9556.5166016	16.4468594	535.537452195888	581.054192121324
PO20C	9781.2158203	10194.8017578	17.5996666	555.761426770437	579.261072922825
PO20D	10603.9843750	11233.3437500	18.9639931	559.164112699451	592.351183148237
PO20E	8718.8027344	9109.3300781	15.2636948	571.211810026495	596.797184263669
PO20F	10005.5537109	10691.4072266	14.6556034	682.711822762617	729.509862869242
PO20G	7902.1059570	8461.5117188	14.7666416	535.132237312511	573.015310319443
PO21A	6295.1494141	6704.2451172	15.7288399	400.229734304817	426.239008078403
PO21B	10260.8671875	10675.7802734	16.7682648	611.921824344043	636.665773157399
PO21C	9673.8281250	10217.5156250	16.1766872	598.010458222868	631.619780902977
PO21D	9908.2226562	10366.6425781	15.1525602	653.897593899676	684.151222055531
PO21E	9291.7294922	9684.0009766	17.4951801	531.102248681624	553.523937521512
PO21F	4575.9296875	4937.2041016	14.5620785	314.236026642763	339.04528818465
PO21G	12008.7851562	12533.7070312	16.7080002	718.744614104086	750.162011082571
PO21H	10489.7373047	11204.7119141	15.8208046	663.034375931803	708.226426998536
PO21I	7491.5820312	7912.9853516	13.6283522	549.705637281666	580.626713741666
PO21J	8484.5351562	9083.6015625	14.7471418	575.33420857186	615.956751870386
PO22A	8405.1494141	9061.8642578	12.8389997	654.657653282755	705.807653987249
PO22B	9162.5996094	9569.2001953	13.3849201	684.54645533521	714.923968451631
PO22C	7547.4746094	7857.5302734	16.2810726	463.573549165305	482.617482671258
PO22D	8286.0546875	8733.5234375	14.1396875	586.013989877782	617.660286869848
PO22E	9796.6855469	10348.8476562	15.7375631	622.503337057311	657.588953921335
PO22F	6880.2685547	7503.7416992	15.9800367	430.553989572502	469.569741301032
PO22G	10007.5126953	10652.1679688	14.8465214	674.064477844622	717.485778776435
PO22H	9596.8261719	10116.9589844	13.8836689	691.231276186657	728.694918992198
PO22I	13807.1425781	14579.8339844	18.3077736	754.168304664856	796.373950374829
PO22J	12640.2626953	13403.9296875	17.8895912	706.570796055977	749.258579340818
PO23A	16163.4189453	16571.1484375	16.9950733	951.064973947479	975.056014468617
PO23B	14099.9814453	14950.1357422	14.8799314	947.583766770591	1004.71805550125
PO23C	17819.8066406	18608.1015625	17.8937931	995.865244502017	1039.91934289773
PO23D	7617.4257812	8039.1728516	15.5240555	490.685296841409	517.852622441346
