# Supplementary material for: 45S rDNA Diversity In Natura as One Step towards Ribosomal Heterogeneity in Arabidopsis thaliana
Source: Plants (Basel). 2023 Jul 21;12(14):2722. doi: 10.3390/plants12142722 (PMC10386311; doi:10.3390/plants12142722)
Supplement: Supplementary file 1 [file plants-12-02722-s001.zip › Table_S2.ods]

## Sheet: 5R genotypes (%)
Site	Locality	5R1	5R2	5R3	5R4	5R5	5R6	5R7	5R8	5R9	5R10	ND	TOTAL
PO01	Mas_Larrieu	7											7
PO02	Mas_Larrieu	36	2	2									40
PO03	Mas_Larrieu	9											9
PO04	Mas_Larrieu	8	1										9
PO05	Mas_Larrieu	7											7
PO06	Mas_Larrieu	4	2									1	7
PO07	Mas_Larrieu	6					1					1	8
PO08	Mas_Larrieu	11		2									13
PO09	Mas_Larrieu	4											4
PO10	Massane	18											18
PO11	Py1000	9	1										10
PO12	Py1000	28	1	1	1			9		13		2	55
PO13	Py1900		9	1									10
PO14	Py1900	3									6		9
PO15	Py1900	7	1										8
PO16	Mantet	26					1						27
PO17	Mantet	23	1				4						28
PO18	Mantet	10											10
PO19	Mantet	2					7					1	10
PO20	Mantet	7											7
PO21	Mantet					4	5					1	10
PO22	Mantet								10				10
PO23	Mosset	4											4
	TOTAL	229	18	6	1	4	18	9	10	13	6	6	320
	%	71,6	5,6	1,9	0,3	1,3	5,6	2,8	3,1	4,1	1,9	1,9

## Sheet: 5R genotypes (QGIS attributes)
Site	Locality	X	Y	Z	Taille pop	N	5R1	5R2	5R3	5R4	5R5	5R6	5R7	5R8	5R9	5R10	ND	TOTAL
PO01	Mas_Larrieu	3.03597778	42.58792222	5	>500	7	100											100
PO02	Mas_Larrieu	3.03905278	42.58856944	5	>500	40	90	5	5									100
PO03	Mas_Larrieu	3.03999722	42.58910556	4	50-100	9	100											100
PO04	Mas_Larrieu	3.03781667	42.58902222	5	>250	9	88.9	11.1										100
PO05	Mas_Larrieu	3.03965000	42.58068333	5	20-50	7	100											100
PO06	Mas_Larrieu	3.04223333	42.58008333	5	>1000	7	57.1	28.6									14.3	100
PO07	Mas_Larrieu	3.04148333	42.58733333	7	<20	8	75					12.5					12.5	100
PO08	Mas_Larrieu	3.04293333	42.58196667	3	100-150	13	84.6		15.4									100
PO09	Mas_Larrieu	3.04222222	42.59083333	3	>250	4	100											100
PO10	Massane	3.02647222	42.49798611	760	20-50	18	100											100
PO11	Py1000	2.35497582	42.49436567	1002	20-50	10	90	10										100
PO12	Py1000	2.35547751	42.49409832	1005	50-100	55	51	1.8	1.8	1.8			16.4		23.6		3.6	100
PO13	Py1900	2.31370017	42.49190149	1876	50-100	10		90	10									100
PO14	Py1900	2.31439607	42.49280623	1906	50-100	9	33.3									66.7		100
PO15	Py1900	2.31576509	42.49336378	1895	50-100	8	87.5	12.5										100
PO16	Mantet	2.30244271	42.47668569	1446	50-100	27	96.3					3.7						100
PO17	Mantet	2.30242848	42.47577602	1459	50-100	28	82.1	3.6				14.3						100
PO18	Mantet	2.30762407	42.47349301	1514	50-100	10	100											100
PO19	Mantet	2.30813005	42.47283864	1530	50-100	10	20					70					10	100
PO20	Mantet	2.30839687	42.47291230	1527	50-100	7	100											100
PO21	Mantet	2.31069691	42.47172838	1557	50-100	10					40	50					10	100
PO22	Mantet	2.31112789	42.47125366	1565	50-100	10								100				100
PO23	Mosset	2.34777778	42.67222222	850	50-100	4	100											100

## Sheet: 3R genotypes (%)
Site	Locality	3R1 var1	3R3 var3	3R4.1 var1+var2	3R4.2 VAR1+var2	3R4.3 var1+VAR2	3R5.1 var1+var3	3R5.2 VAR1+var3	3R5.3 var1+VAR3	3R6 VAR2+var3	3R7 var1+var2+var3	3R8 VAR1+var6	R9 var1+var3+var7	TOTAL
PO01	Mas_Larrieu				1				3	3				7
PO02	Mas_Larrieu	11		5	17	7								40
PO03	Mas_Larrieu	3	1									5		9
PO04	Mas_Larrieu	7	1	1										9
PO05	Mas_Larrieu												7	7
PO06	Mas_Larrieu	2			1	1							3	7
PO07	Mas_Larrieu			1			3				1		3	8
PO08	Mas_Larrieu	6		2	4		1							13
PO09	Mas_Larrieu						2						2	4
PO10	Massane	4		2	12									18
PO11	Py1000			7				3						10
PO12	Py1000	3						52						55
PO13	Py1900			1	9									10
PO14	Py1900	9												9
PO15	Py1900	6			2									8
PO16	Mantet	27												27
PO17	Mantet	28												28
PO18	Mantet	10												10
PO19	Mantet	10												10
PO20	Mantet	7												7
PO21	Mantet	10												10
PO22	Mantet	10												10
PO23	Mosset	1			3									4
	TOTAL	154	2	19	49	8	6	55	3	3	1	5	15	320
	%	48,1	0,6	5,9	15,3	2,5	1,9	17,2	0,9	0,9	0,3	1,6	4,7

## Sheet: 3R genotypes (QGIS attributes)
Site	Locality	X	Y	Z	Taille pop	N	3R1 var1	3R3 var3	3R4.1 var1+var2	3R4.2 VAR1+var2	3R4.3 var1+VAR2	3R5.1 var1+var3	3R5.2 VAR1+var3	3R5.3 var1+VAR3	3R6 VAR2+var3	3R7 var1+var2+var3	3R8 VAR1+var6	R9 var1+var3+var7	TOTAL
PO01	Mas_Larrieu	3.03597778	42.58792222	5	>500	7				14.2				42.9	42.9				100
PO02	Mas_Larrieu	3.03905278	42.58856944	5	>500	40	27.5		12.5	42.5	17.5								100
PO03	Mas_Larrieu	3.03999722	42.58910556	4	50-100	9	33.3	11.1									55.6		100
PO04	Mas_Larrieu	3.03781667	42.58902222	5	>250	9	77.8	11.1	11.1										100
PO05	Mas_Larrieu	3.03965000	42.58068333	5	20-50	7												100	100
PO06	Mas_Larrieu	3.04223333	42.58008333	5	>1000	7	28.6			14.3	14.3							42.8	100
PO07	Mas_Larrieu	3.04148333	42.58733333	7	<20	8			12.5			37.5				12.5		37.5	100
PO08	Mas_Larrieu	3.04293333	42.58196667	3	100-150	13	46.1		15.4	30.8		7.7							100
PO09	Mas_Larrieu	3.04222222	42.59083333	3	>250	4						50						50	100
PO10	Massane	3.02647222	42.49798611	760	20-50	18	22.2		11.1	66.7									100
PO11	Py1000	2.35497582	42.49436567	1002	20-50	10			70				30						100
PO12	Py1000	2.35547751	42.49409832	1005	50-100	55	5.5						94.5						100
PO13	Py1900	2.31370017	42.49190149	1876	50-100	10			10	90									100
PO14	Py1900	2.31439607	42.49280623	1906	50-100	9	100												100
PO15	Py1900	2.31576509	42.49336378	1895	50-100	8	75			25									100
PO16	Mantet	2.30244271	42.47668569	1446	50-100	27	100												100
PO17	Mantet	2.30242848	42.47577602	1459	50-100	28	100												100
PO18	Mantet	2.30762407	42.47349301	1514	50-100	10	100												100
PO19	Mantet	2.30813005	42.47283864	1530	50-100	10	100												100
PO20	Mantet	2.30839687	42.47291230	1527	50-100	7	100												100
PO21	Mantet	2.31069691	42.47172838	1557	50-100	10	100												100
PO22	Mantet	2.31112789	42.47125366	1565	50-100	10	100												100
PO23	Mosset	2.34777778	42.67222222	850	50-100	4	25			75									100

## Sheet: correlation matrix sea level and altitude
At66	5R1	5R2	5R3	5R4	5R5	5R6	5R7	5R8	5R9	5R10	ND	total
3R1 var1	111	3	1		4	17		10		6	2	154
3R3 var3	2											2
3R4.1 var1+var2	15	3	1									19
3R4.2 VAR1+var2	35	10	4									49
3R4.3 var1+VAR2	7	1										8
3R5.1 var1+var3	5										1	6
3R5.2 VAR1+var3	29	1		1			9		13		2	55
3R5.3 var1+VAR3	3											3
3R6 VAR2+var3	3											3
3R7 var1+var2+var3	0					1						1
3R8 VAR1+var6	5											5
3R9 var1+var3+var7	14										1	15
total	229	18	6	1	4	18	9	10	13	6	6	320
sea level	5R1	5R2	5R3	5R4	5R5	5R6	5R7	5R8	5R9	5R10	ND	total
3R1 var1	27	2										29
3R3 var3	2											2
3R4.1 var1+var2	7	1	1									9
3R4.2 VAR1+var2	19	1	3									23
3R4.3 var1+VAR2	7	1										8
3R5.1 var1+var3	5										1	6
3R5.2 VAR1+var3	0											0
3R5.3 var1+VAR3	3											3
3R6 VAR2+var3	3											3
3R7 var1+var2+var3	0					1						1
3R8 VAR1+var6	5											5
3R9 var1+var3+var7	14										1	15
total	92	5	4	0	0	1	0	0	0	0	2	104
altitude	5R1	5R2	5R3	5R4	5R5	5R6	5R7	5R8	5R9	5R10	ND	total
3R1 var1	84	1			4	17		10		6	2	124
3R3 var3												0
3R4.1 var1+var2	8	2										10
3R4.2 VAR1+var2	16	9	1									26
3R4.3 var1+VAR2												0
3R5.1 var1+var3												0
3R5.2 VAR1+var3	29	1		1			9		13		2	55
3R5.3 var1+VAR3												0
3R6 VAR2+var3												0
3R7 var1+var2+var3												0
3R8 VAR1+var6												0
3R9 var1+var3+var7												0
total	137	13	1	1	4	17	9	10	13	6	4	215

## Sheet: correlation matrix sea level, mid and high altitude
At66	5R1	5R2	5R3	5R4	5R5	5R6	5R7	5R8	5R9	5R10	ND	total
3R1 var1	111	3	1		4	17		10		6	2	154
3R3 var3	2											2
3R4.1 var1+var2	15	3	1									19
3R4.2 VAR1+var2	35	10	4									49
3R4.3 var1+VAR2	7	1										8
3R5.1 var1+var3	5										1	6
3R5.2 VAR1+var3	29	1		1			9		13		2	55
3R5.3 var1+VAR3	3											3
3R6 VAR2+var3	3											3
3R7 var1+var2+var3	0					1						1
3R8 VAR1+var6	5											5
3R9 var1+var3+var7	14										1	15
total	229	18	6	1	4	18	9	10	13	6	6	320
sea level	5R1	5R2	5R3	5R4	5R5	5R6	5R7	5R8	5R9	5R10	ND	total
3R1 var1	27	2										29
3R3 var3	2											2
3R4.1 var1+var2	7	1	1									9
3R4.2 VAR1+var2	19	1	3									23
3R4.3 var1+VAR2	7	1										8
3R5.1 var1+var3	5										1	6
3R5.2 VAR1+var3	0											0
3R5.3 var1+VAR3	3											3
3R6 VAR2+var3	3											3
3R7 var1+var2+var3	0					1						1
3R8 VAR1+var6	5											5
3R9 var1+var3+var7	14										1	15
total	92	5	4	0	0	1	0	0	0	0	2	104
mid-altitude	5R1	5R2	5R3	5R4	5R5	5R6	5R7	5R8	5R9	5R10	ND	total
3R1 var1	7		1									8
3R3 var3												0
3R4.1 var1+var2	8	1										9
3R4.2 VAR1+var2	15											15
3R4.3 var1+VAR2												0
3R5.1 var1+var3												0
3R5.2 VAR1+var3	29	1		1			9		13		2	55
3R5.3 var1+VAR3												0
3R6 VAR2+var3												0
3R7 var1+var2+var3												0
3R8 VAR1+var6												0
3R9 var1+var3+var7												0
total	59	2	1	1	0	0	9	0	13	0	2	87
high altitude	5R1	5R2	5R3	5R4	5R5	5R6	5R7	5R8	5R9	5R10	ND	total
3R1 var1	77	1			4	17		10		6	2	117
3R3 var3												0
3R4.1 var1+var2		1										1
3R4.2 VAR1+var2	1	9	1									11
3R4.3 var1+VAR2												0
3R5.1 var1+var3												0
3R5.2 VAR1+var3												0
3R5.3 var1+VAR3												0
3R6 VAR2+var3												0
3R7 var1+var2+var3												0
3R8 VAR1+var6												0
3R9 var1+var3+var7												0
total	78	11	1	0	4	17	0	10	0	6	2	129
